# Supplementary material for: Phenylisoxazole-3/5-Carbaldehyde Isonicotinylhydrazone Derivatives: Synthesis, Characterization, and Antitubercular Activity
Source: Hindawi journal article supplement (doi:10.1155/2021/6014093), 2021-10-31
Supplement: f1 [file 6014093.f1.zip]

Archive with 2 entries (2 files):
- 6014093.f1/SUMMARY SUP MAT_2021.pdf
- 6014093.f1/SUP MAT-ARTICLE_2021.pdf
