# Supplementary material for: Phenylisoxazole-3/5-Carbaldehyde Isonicotinylhydrazone Derivatives: Synthesis, Characterization, and Antitubercular Activity
Source: Hindawi journal article supplement (doi:10.1155/2021/6014093), 2021-10-31
Supplement: f1 [file 6014093.f1.zip]

Title: Phenylisoxazole - 3/5 – carbaldehyde isonicotinohydrazide derivatives : Synthesis Characterization, and antituberculous activity

Autors: Fernando Carrasco, Wilfredo Hernández, Oscar Chupayo, Patricia Sheen, Mirko Zimic, Jorge Coronel, Celedonio M. Álvarez, Sergio Ferrero, Sandra Oramas-Royo, Evgenia Spodine, Jesus M. Rodilla, Juan Z. Dávalos.

Description of Supporting Information:

- **Table S1.** Computational results, at B3LYP/6-311++G(d,p) for **1** to **8** synthesized compounds. Relative enthalpies ( $\Delta H$ ) of stable conformers and their equilibrium molar fractions (populations).
- **Figure 1.** Linear Correlation of vibrational frequencies (given as wave numbers  $\sigma$ , in  $\text{cm}^{-1}$ ) between experimental IR data and the corresponding to B3LYP/6-311++G(d,p) theoretical values for **1** to **8** synthesized compounds.
- **Compound 1**
  - $^1\text{H}$  NMR spectra
  - $^{13}\text{C}$  NMR spectra
  - Two-dimensional NMR spectroscopy ( $^1\text{H}$ - $^1\text{H}$  DQF COSY)
  - Two-dimensional NMR spectroscopy ( $^1\text{H}$ - $^1\text{H}$  NOESY)
  - Two-dimensional NMR spectroscopy ( $^1\text{H}$ - $^{13}\text{C}$  HSQC)
  - Mass spectra
  - Infrared spectra
- **Compound 2**
  - $^1\text{H}$  NMR spectra
  - $^{13}\text{C}$  NMR spectra
  - Two-dimensional NMR spectroscopy ( $^1\text{H}$ - $^1\text{H}$  DQF COSY)
  - Two-dimensional NMR spectroscopy ( $^1\text{H}$ - $^{13}\text{C}$  HMBC)
  - Two-dimensional NMR spectroscopy ( $^1\text{H}$ - $^{13}\text{C}$  HSQC)
  - Mass spectra
  - Infrared spectra

- **Compound 3**
  - $^1\text{H}$  NMR spectra
  - $^{13}\text{C}$  NMR spectra
  - Mass spectra
  - Infrared spectra
- **Compound 4**
  - $^1\text{H}$  NMR spectra
  - $^{13}\text{C}$  NMR spectra
  - Mass spectra
  - Infrared spectra
- **Compound 5**
  - $^1\text{H}$  NMR spectra
  - Mass spectra
  - Infrared spectra
- **Compound 6**
  - $^1\text{H}$  NMR spectra
  - $^{13}\text{C}$  NMR spectra / DEPT 45, DEPT 90 spectra
  - Two-dimensional NMR spectroscopy ( $^1\text{H}$ - $^1\text{H}$  COSY)
  - Two-dimensional NMR spectroscopy ( $^1\text{H}$ - $^{13}\text{C}$  HMBC)
  - Two-dimensional NMR spectroscopy ( $^1\text{H}$ - $^{13}\text{C}$  HSQC)
  - Infrared spectra
- **Compound 7**
  - $^1\text{H}$  NMR spectra
  - $^{13}\text{C}$  NMR spectra
  - Two-dimensional NMR spectroscopy ( $^1\text{H}$ - $^1\text{H}$  DQF COSY)
  - Two-dimensional NMR spectroscopy ( $^1\text{H}$ - $^{13}\text{C}$  HMBC)
  - Two-dimensional NMR spectroscopy ( $^1\text{H}$ - $^{13}\text{C}$  HSQC)
  - Infrared spectra

- **Compound 8**
  - $^1\text{H}$  NMR spectra
  - $^{13}\text{C}$  NMR spectra
  - Mass spectra
  - Infrared spectra
