# Supplementary material for: Phenylisoxazole-3/5-Carbaldehyde Isonicotinylhydrazone Derivatives: Synthesis, Characterization, and Antitubercular Activity
Source: Hindawi journal article supplement (doi:10.1155/2021/6014093), 2021-10-31
Supplement: f1 [file 6014093.f1.zip]

# SUPPORTING INFORMATION

associated with the paper

## Phenylisoxazole - 3/5 – carbaldehyde isonicotinohydrazide derivatives :

### Synthesis Characterization, and antituberculous activity

Fernando Carrasco, Wilfredo Hernández, Oscar Chupayo, Juan Z. Dávalos, Patricia Sheen, Mirko Zimic, Jorge Coronel, Celedonio M. Álvarez, Sergio Ferrero, Sandra Oramas-Royo, Evgenia Spodine, Jesus M. Rodilla.

Supplementary table 1. Computational results, at B3LYP/6-311++G(d,p) for **1** to **8** synthesized compounds. Relative enthalpies ( $\Delta H$ ) of stable conformers and their equilibrium molar fractions (populations).

| Compound  |               | $E_0^a$   | $G_{298}^a$ | $H_{298}^a$ | $\Delta H^b$ | $\mu^c$ | Population (%) |
|-----------|---------------|-----------|-------------|-------------|--------------|---------|----------------|
| Gas phase |               |           |             |             |              |         |                |
| <b>1</b>  | <i>cisE</i>   | -1085.832 | -1085.636   | -1085.566   | 0.0          | 3.159   | 90.2           |
|           | <i>transE</i> | -1085.830 | -1085.634   | -1085.563   | 6.6          | 2.311   | 8.8            |
|           | <i>cisZ</i>   | -1085.828 | -1085.632   | -1085.561   | 12.0         | 4.395   | 1.0            |
|           | <i>transZ</i> | -1085.825 | -1085.628   | -1085.558   | 20.5         | 5.432   | < 0.1          |
| <b>2</b>  | <i>cisE</i>   | -1101.120 | -1100.885   | -1100.811   | 0.0          | 3.074   | 88.5           |
|           | <i>transE</i> | -1101.118 | -1100.883   | -1100.809   | 6.3          | 1.221   | 9.8            |
|           | <i>cisZ</i>   | -1101.117 | -1100.882   | -1100.808   | 9.2          | 4.407   | 1.7            |
|           | <i>transZ</i> | -1101.114 | -1100.878   | -1100.804   | 18.7         | 5.788   | < 0.1          |
| <b>3</b>  | <i>cisE</i>   | -1446.183 | -1445.989   | -1445.917   | 0.0          | 3.042   | 87.1           |
|           | <i>transE</i> | -1446.180 | -1445.987   | -1445.915   | 6.2          | 2.285   | 12.3           |
|           | <i>cisZ</i>   | -1446.179 | -1445.984   | -1445.913   | 11.6         | 4.460   | 0.6            |
|           | <i>transZ</i> | -1446.175 | -1445.981   | -1445.909   | 20.5         | 5.362   | < 0.1          |
| <b>4</b>  | <i>cisE</i>   | -1446.187 | -1445.995   | -1445.921   | 0.0          | 2.301   | 92.7           |
|           | <i>transE</i> | -1446.185 | -1445.992   | -1445.919   | 5.4          | 2.910   | 7.2            |
|           | <i>cisZ</i>   | -1446.182 | -1445.988   | -1445.916   | 13.2         | 3.133   | 0.1            |
|           | <i>transZ</i> | -1446.178 | -1445.985   | -1445.912   | 23.9         | 3.728   | < 0.1          |
| <b>5</b>  | <i>cisE</i>   | -3560.107 | -3559.916   | -3559.842   | 0.0          | 0.862   | 82.9           |
|           | <i>transE</i> | -3560.105 | -3559.915   | -3559.840   | 5.2          | 2.573   | 16.8           |

|         |               |           |           |           |      |       |       |
|---------|---------------|-----------|-----------|-----------|------|-------|-------|
|         | <i>cisZ</i>   | -3560.103 | -3559.911 | -3559.837 | 12.9 | 1.666 | 0.3   |
|         | <i>transZ</i> | -3560.098 | -3559.907 | -3559.833 | 24.6 | 2.677 | < 0.1 |
| 6       | <i>cisE</i>   | -1101.126 | -1100.892 | -1100.818 | 0.0  | 5.232 | 90.8  |
|         | <i>transE</i> | -1101.124 | -1100.890 | -1100.815 | 5.3  | 3.712 | 9.2   |
|         | <i>cisZ</i>   | -1101.120 | -1100.885 | -1100.810 | 19.1 | 6.879 | < 0.1 |
|         | <i>transZ</i> | -1101.115 | -1100.882 | -1100.806 | 30.2 | 7.715 | < 0.1 |
|         |               |           |           |           |      |       |       |
| 7       | <i>cisE</i>   | -1025.897 | -1025.667 | -1025.594 | 0.0  | 4.128 | 84.0  |
|         | <i>transE</i> | -1025.895 | -1025.666 | -1025.592 | 5.2  | 2.374 | 15.9  |
|         | <i>cisZ</i>   | -1025.890 | -1025.660 | -1025.586 | 19.5 | 5.871 | 0.1   |
|         | <i>transZ</i> | -1025.885 | -1025.656 | -1025.582 | 30.7 | 6.881 | < 0.1 |
| 8       | <i>cisE</i>   | -1446.191 | -1445.997 | -1445.925 | 0.0  | 1.694 | 86.0  |
|         | <i>transE</i> | -1446.189 | -1445.995 | -1445.923 | 4.6  | 1.475 | 14.0  |
|         | <i>cisZ</i>   | -1446.183 | -1445.989 | -1445.917 | 20.5 | 3.393 | < 0.1 |
|         | <i>transZ</i> | -1446.178 | -1445.986 | -1445.913 | 32.1 | 4.279 | < 0.1 |
| Acetone |               |           |           |           |      |       |       |
| 1       | <i>cisE</i>   | -1085.849 | -1085.653 | -1085.582 | 2.5  | 3.925 | 28.5  |
|         | <i>transE</i> | -1085.85  | -1085.654 | -1085.583 | 0.0  | 3.463 | 71.4  |
|         | <i>cisZ</i>   | -1085.843 | -1085.646 | -1085.576 | 18.2 | 5.787 | < 0.1 |
|         | <i>transZ</i> | -1085.843 | -1085.646 | -1085.576 | 17.9 | 7.336 | < 0.1 |
| 2       | <i>cisE</i>   | -1101.139 | -1100.904 | -1100.830 | 2.7  | 3.413 | 4.5   |
|         | <i>transE</i> | -1101.14  | -1100.906 | -1100.831 | 0.0  | 1.306 | 95.4  |
|         | <i>cisZ</i>   | -1101.133 | -1100.898 | -1100.824 | 16.9 | 5.578 | < 0.1 |
|         | <i>transZ</i> | -1101.133 | -1100.898 | -1100.824 | 17.4 | 8.012 | < 0.1 |
| 3       | <i>cisE</i>   | -1446.2   | -1446.006 | -1445.934 | 2.6  | 3.915 | 23.6  |
|         | <i>transE</i> | -1446.201 | -1446.007 | -1445.935 | 0.0  | 3.466 | 76.4  |
|         | <i>cisZ</i>   | -1446.194 | -1446.000 | -1445.929 | 18.0 | 5.748 | < 0.1 |
|         | <i>transZ</i> | -1446.194 | -1445.999 | -1445.929 | 18.2 | 7.234 | < 0.1 |
| 4       | <i>cisE</i>   | -1446.204 | -1446.011 | -1445.939 | 2.6  | 3.287 | 6.3   |
|         | <i>transE</i> | -1446.205 | -1446.013 | -1445.940 | 0.0  | 4.238 | 93.6  |
|         | <i>cisZ</i>   | -1446.199 | -1446.004 | -1445.933 | 18.4 | 4.247 | < 0.1 |
|         | <i>transZ</i> | -1446.198 | -1446.005 | -1445.932 | 19.7 | 5.305 | < 0.1 |
| 5       | <i>cisE</i>   | -3560.125 | -3559.933 | -3559.860 | 2.5  | 1.440 | 34.6  |
|         | <i>transE</i> | -3560.126 | -3559.934 | -3559.860 | 0.0  | 3.463 | 65.3  |
|         | <i>cisZ</i>   | -3560.119 | -3559.927 | -3559.853 | 18.7 | 2.249 | < 0.1 |
|         | <i>transZ</i> | -3560.119 | -3559.926 | -3559.853 | 19.9 | 3.893 | < 0.1 |
| 6       | <i>cisE</i>   | -1101.145 | -1100.911 | -1100.836 | 2.6  | 6.201 | 28.1  |
|         | <i>transE</i> | -1101.146 | -1100.911 | -1100.837 | 0.0  | 4.920 | 71.9  |
|         | <i>cisZ</i>   | -1101.137 | -1100.903 | -1100.828 | 23.7 | 8.330 | < 0.1 |
|         | <i>transZ</i> | -1101.137 | -1100.902 | -1100.828 | 24.0 | 9.946 | < 0.1 |
| 7       | <i>cisE</i>   | -1025.914 | -1025.684 | -1025.611 | 2.6  | 4.824 | 22.4  |
|         | <i>transE</i> | -1025.915 | -1025.685 | -1025.612 | 0.0  | 3.144 | 77.6  |
|         | <i>cisZ</i>   | -1025.906 | -1025.676 | -1025.603 | 24.1 | 7.189 | < 0.1 |
|         | <i>transZ</i> | -1025.906 | -1025.675 | -1025.602 | 24.7 | 9.016 | < 0.1 |

|             |               |           |           |           |      |        |       |
|-------------|---------------|-----------|-----------|-----------|------|--------|-------|
| 8           | <i>cisE</i>   | -1446.208 | -1446.014 | -1445.942 | 2.4  | 2.115  | 45.6  |
|             | <i>transE</i> | -1446.209 | -1446.014 | -1445.943 | 0.0  | 2.460  | 54.4  |
|             | <i>cisZ</i>   | -1446.2   | -1446.006 | -1445.934 | 24.6 | 4.216  | < 0.1 |
|             | <i>transZ</i> | -1446.199 | -1446.005 | -1445.933 | 25.2 | 5.905  | < 0.1 |
| <b>DMSO</b> |               |           |           |           |      |        |       |
| 1           | <i>cisE</i>   | -1085.850 | -1085.654 | -1085.583 | 3.2  | 3.955  | 24.0  |
|             | <i>transE</i> | -1085.851 | -1085.655 | -1085.584 | 0.0  | 3.539  | 76.0  |
|             | <i>cisZ</i>   | -1085.844 | -1085.647 | -1085.577 | 19.0 | 5.856  | < 0.1 |
|             | <i>transZ</i> | -1085.844 | -1085.648 | -1085.577 | 18.1 | 7.444  | < 0.1 |
| 2           | <i>cisE</i>   | -1101.140 | -1100.905 | -1100.831 | 3.3  | 3.418  | 8.3   |
|             | <i>transE</i> | -1101.141 | -1100.907 | -1100.832 | 0.0  | 1.279  | 91.6  |
|             | <i>cisZ</i>   | -1101.134 | -1100.899 | -1100.825 | 17.8 | 5.648  | < 0.1 |
|             | <i>transZ</i> | -1101.135 | -1100.899 | -1100.825 | 17.3 | 8.137  | < 0.1 |
| 3           | <i>cisE</i>   | -1446.201 | -1446.007 | -1445.935 | 3.2  | 3.969  | 19.0  |
|             | <i>transE</i> | -1446.202 | -1446.008 | -1445.937 | 0.0  | 3.552  | 80.9  |
|             | <i>cisZ</i>   | -1446.195 | -1446.001 | -1445.929 | 18.8 | 5.816  | < 0.1 |
|             | <i>transZ</i> | -1446.195 | -1446.001 | -1445.930 | 18.3 | 7.341  | < 0.1 |
| 4           | <i>cisE</i>   | -1446.205 | -1446.012 | -1445.940 | 3.4  | 3.342  | 26.4  |
|             | <i>transE</i> | -1446.207 | -1446.013 | -1445.941 | 0.0  | 4.272  | 73.5  |
|             | <i>cisZ</i>   | -1446.199 | -1446.005 | -1445.934 | 19.3 | 4.300  | < 0.1 |
|             | <i>transZ</i> | -1446.200 | -1446.005 | -1445.934 | 19.0 | 5.471  | < 0.1 |
| 5           | <i>cisE</i>   | -3560.126 | -3559.934 | -3559.860 | 3.1  | 1.474  | 29.1  |
|             | <i>transE</i> | -3560.127 | -3559.935 | -3559.862 | 0.0  | 3.534  | 70.9  |
|             | <i>cisZ</i>   | -3560.120 | -3559.926 | -3559.855 | 17.2 | 2.275  | < 0.1 |
|             | <i>transZ</i> | -3560.120 | -3559.928 | -3559.854 | 19.3 | 4.052  | < 0.1 |
| 6           | <i>cisE</i>   | -1101.146 | -1100.912 | -1100.837 | 3.2  | 6.245  | 21.8  |
|             | <i>transE</i> | -1101.148 | -1100.913 | -1100.838 | 0.0  | 4.990  | 78.2  |
|             | <i>cisZ</i>   | -1101.138 | -1100.904 | -1100.829 | 24.4 | 8.390  | < 0.1 |
|             | <i>transZ</i> | -1101.139 | -1100.903 | -1100.829 | 24.0 | 10.129 | < 0.1 |
| 7           | <i>cisE</i>   | -1025.915 | -1025.685 | -1025.612 | 3.2  | 4.856  | 19.0  |
|             | <i>transE</i> | -1025.916 | -1025.686 | -1025.613 | 0.0  | 3.188  | 81.0  |
|             | <i>cisZ</i>   | -1025.907 | -1025.678 | -1025.603 | 24.7 | 7.302  | < 0.1 |
|             | <i>transZ</i> | -1025.907 | -1025.676 | -1025.604 | 24.4 | 9.134  | < 0.1 |
| 8           | <i>cisE</i>   | -1446.209 | -1446.015 | -1445.943 | 3.0  | 2.139  | 35.5  |
|             | <i>transE</i> | -1446.210 | -1446.016 | -1445.944 | 0.0  | 2.536  | 64.5  |
|             | <i>cisZ</i>   | -1446.200 | -1446.007 | -1445.935 | 25.2 | 4.255  | < 0.1 |
|             | <i>transZ</i> | -1446.201 | -1446.006 | -1445.935 | 24.8 | 5.994  | < 0.1 |

<sup>a</sup>All values in units of Hartree/particle. <sup>b</sup> Values in kJ·mol<sup>-1</sup>.  $E_0$  = Total Energies at 0 K.  $H_{298}$  = Enthalpies and  $G_{298}$  = Gibbs Free Energies at 298.15 K. <sup>c</sup> Value in Debye.  $\mu$  = Dipole Moment.

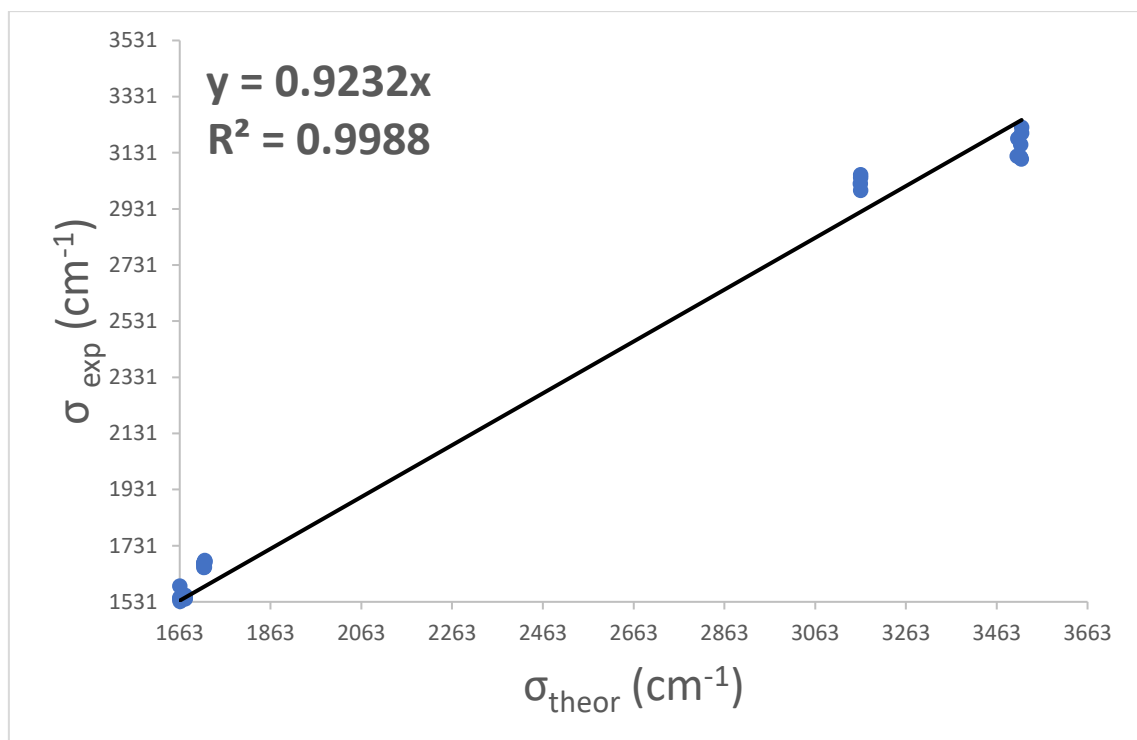

Supplementary figure 1. Linear Correlation of vibrational frequencies (given as wave numbers  $\sigma$ , in  $\text{cm}^{-1}$ ) between experimental IR data and the corresponding to B3LYP/6-311++G(d,p) theoretical values for **1** to **8** synthesized compounds

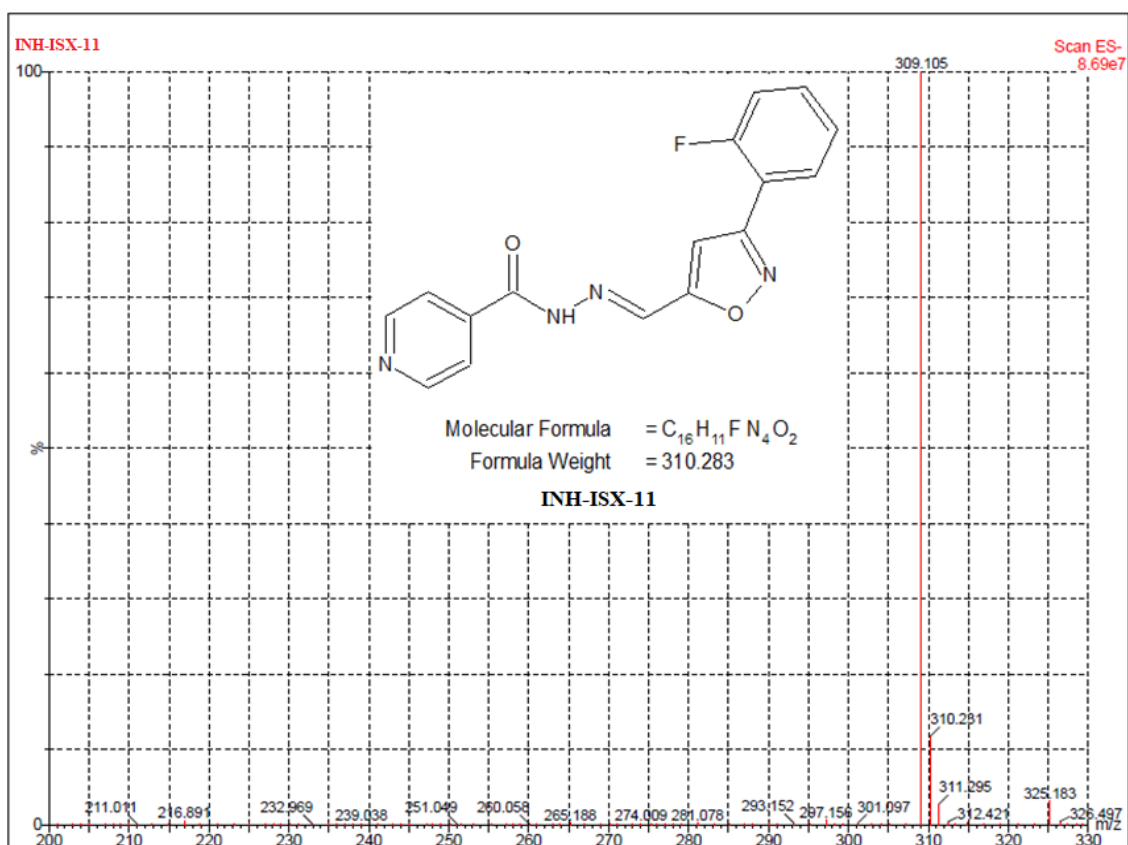

Supplementary figure 2. ESI-mas spectrum of compound 1

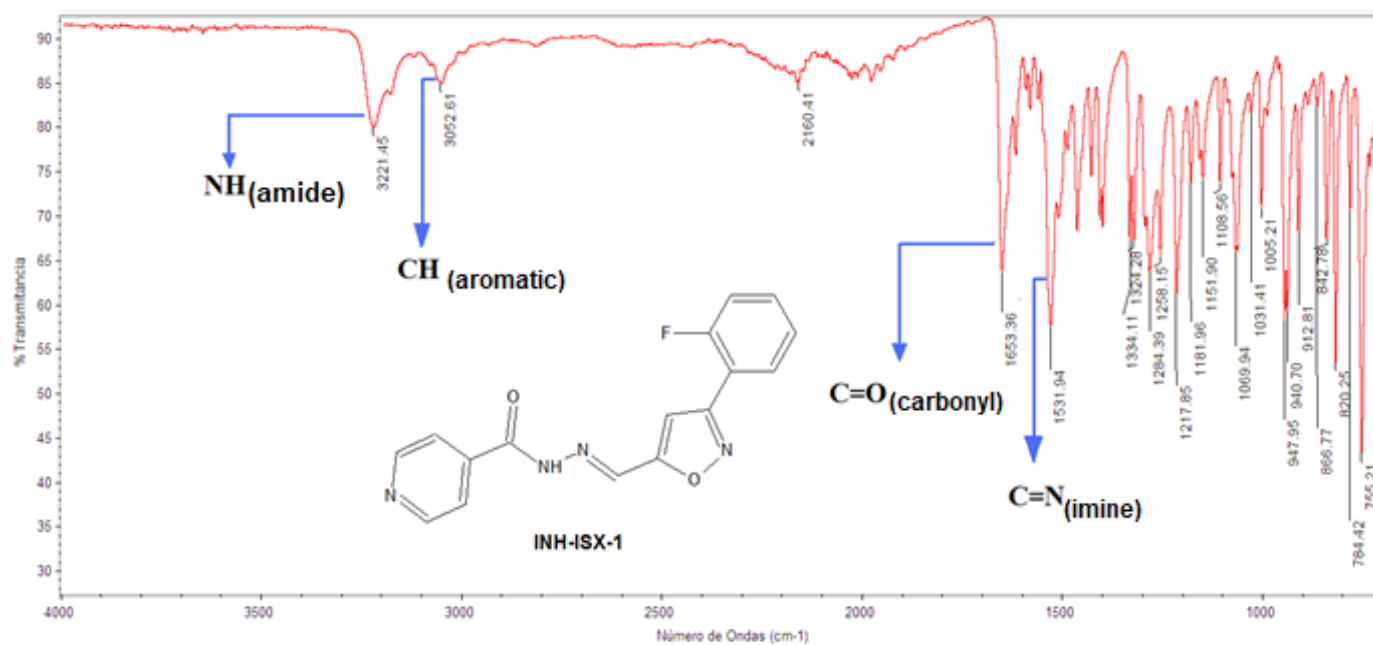

Supplementary figure 3. FT-IR spectrum of compound 1

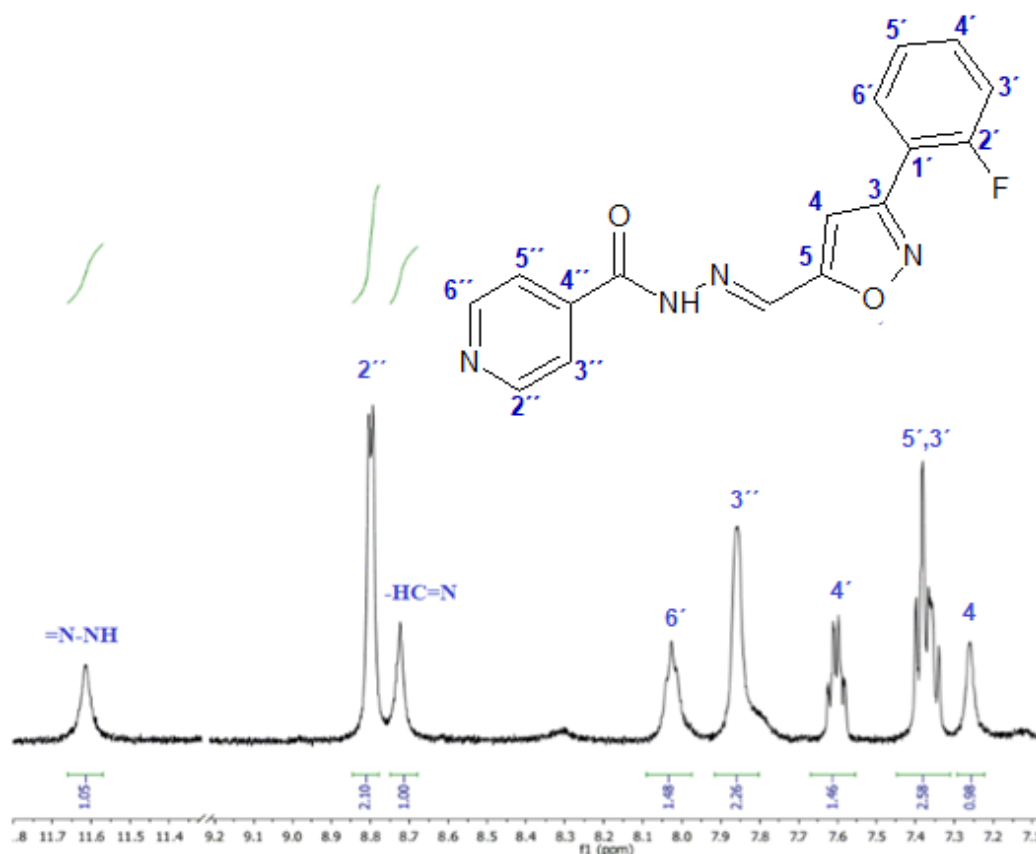

Supplementary figure 4.  $^1\text{H}$  NMR spectrum of compound **1** (500 MHz, acetone- $d_6$ )

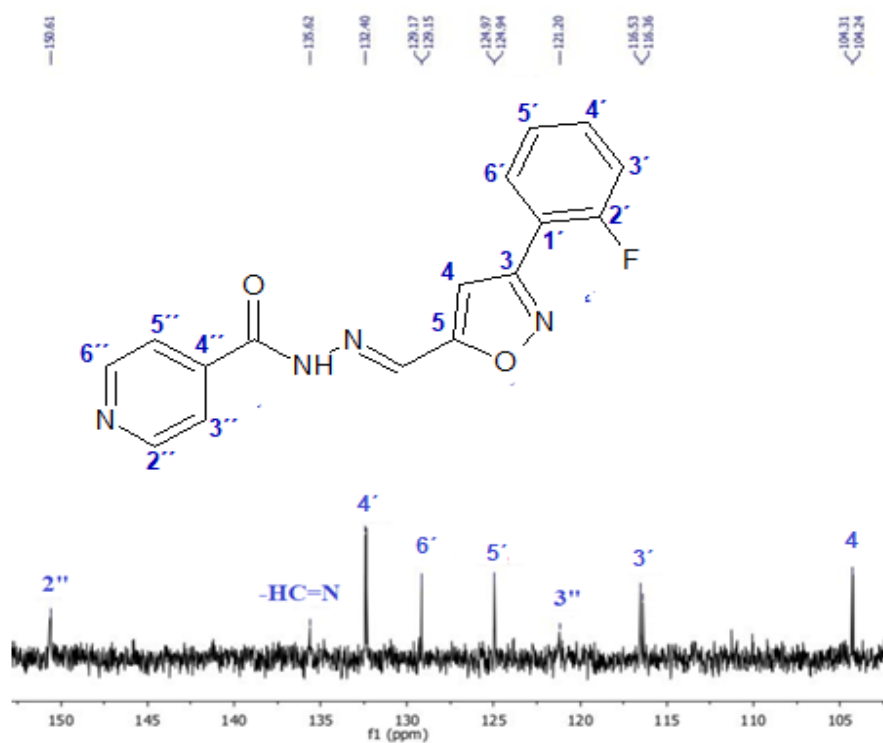

Supplementary figure 5.  $^{13}\text{C}\{^1\text{H}\}$  NMR spectrum of compound **1** (126 MHz, acetone- $d_6$ )

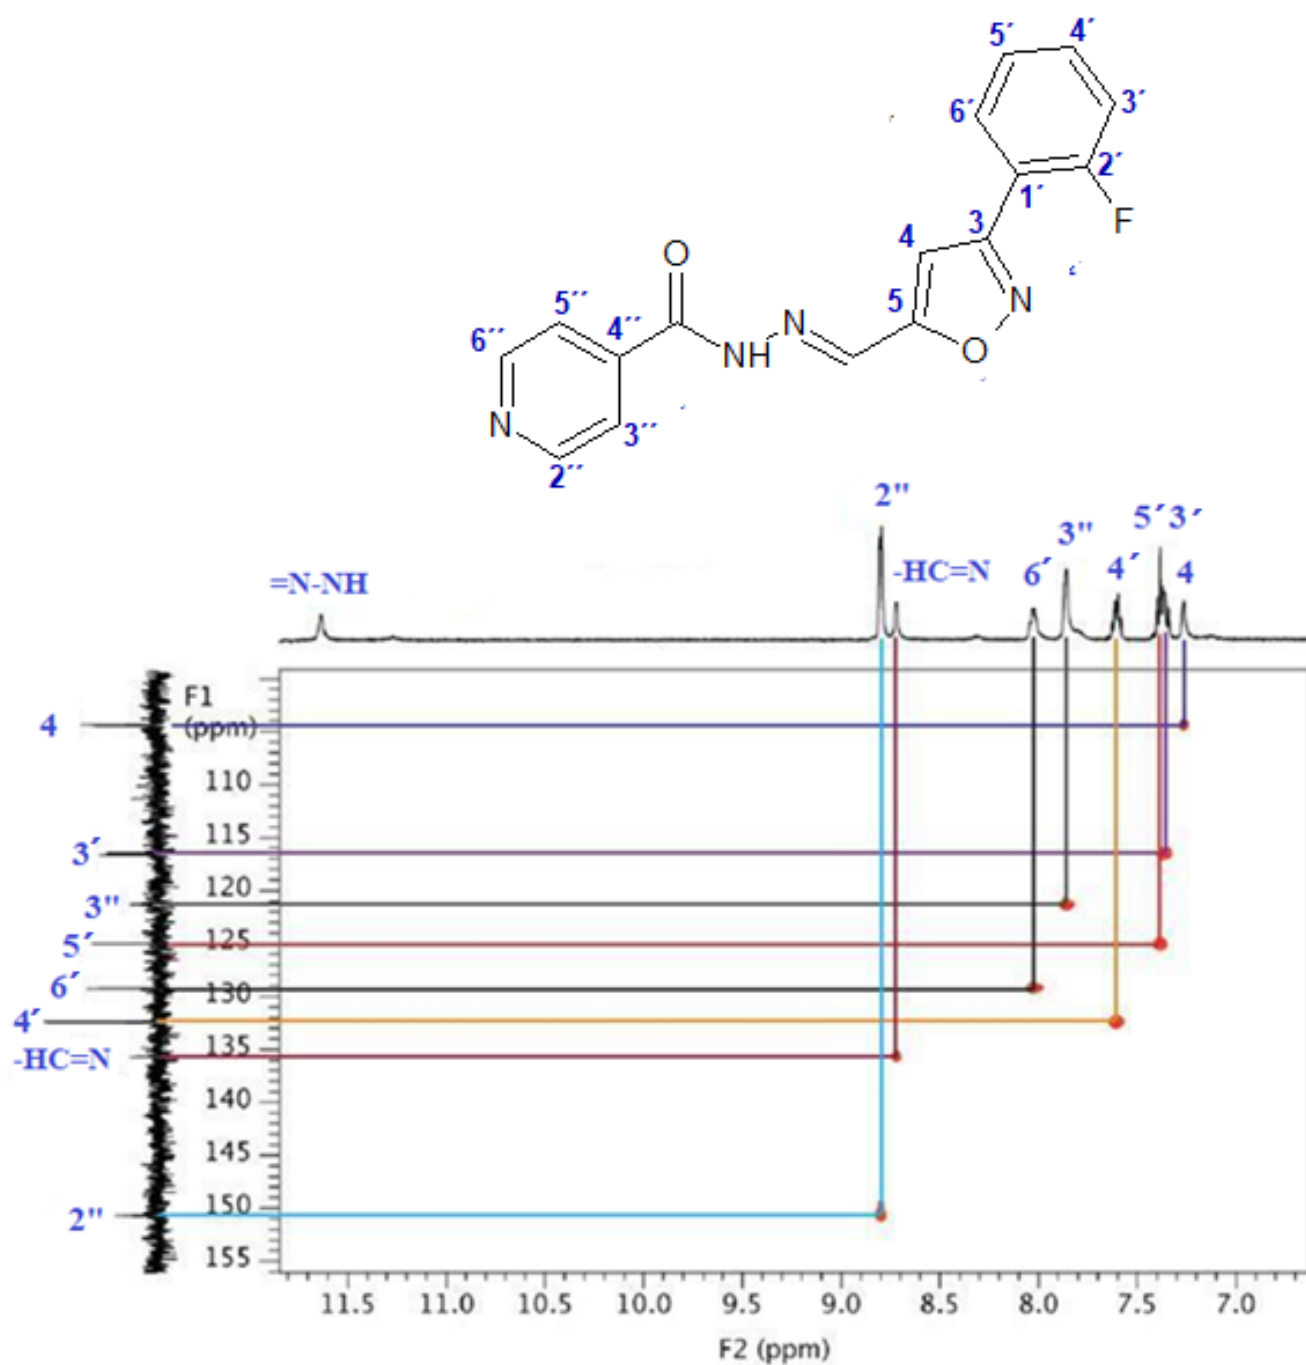

Supplementary figure 6. Two-dimensional  $^1\text{H}$ - $^{13}\text{C}$  HSQC NMR spectrum, recorded in acetone- $d_6$  for **1**

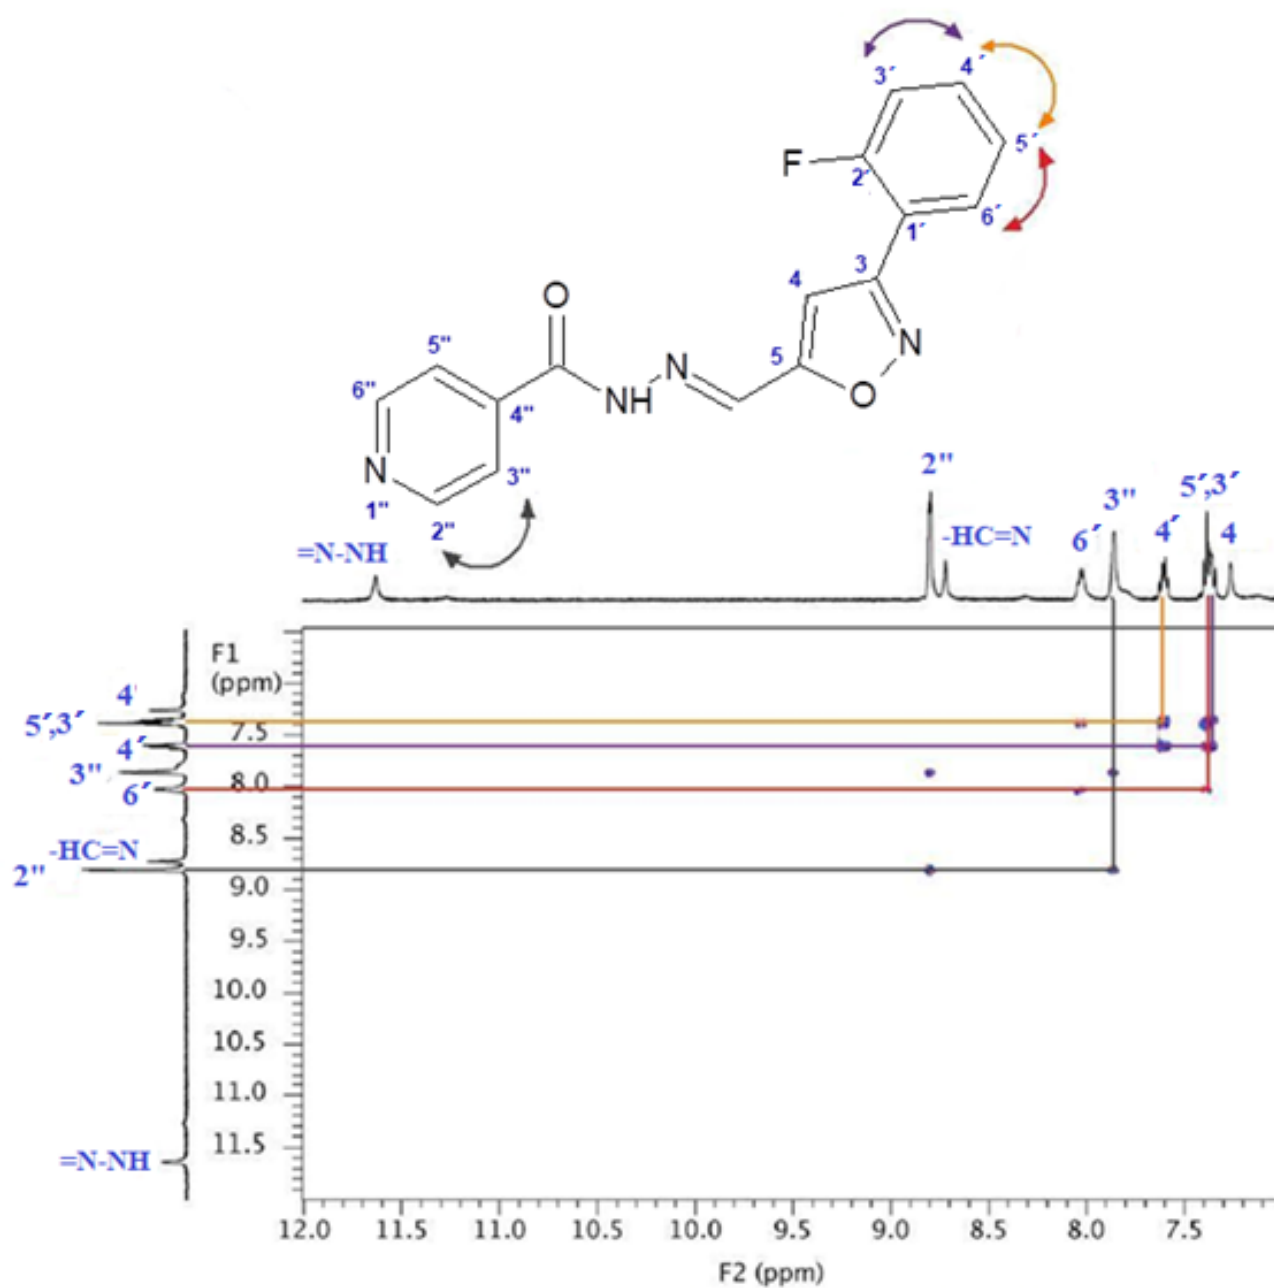

Supplementary figure 7. Two-dimensional  $^1\text{H}$  -  $^1\text{H}$  DQFCOSY NMR spectrum, recorded in acetone- $d_6$  for **1**



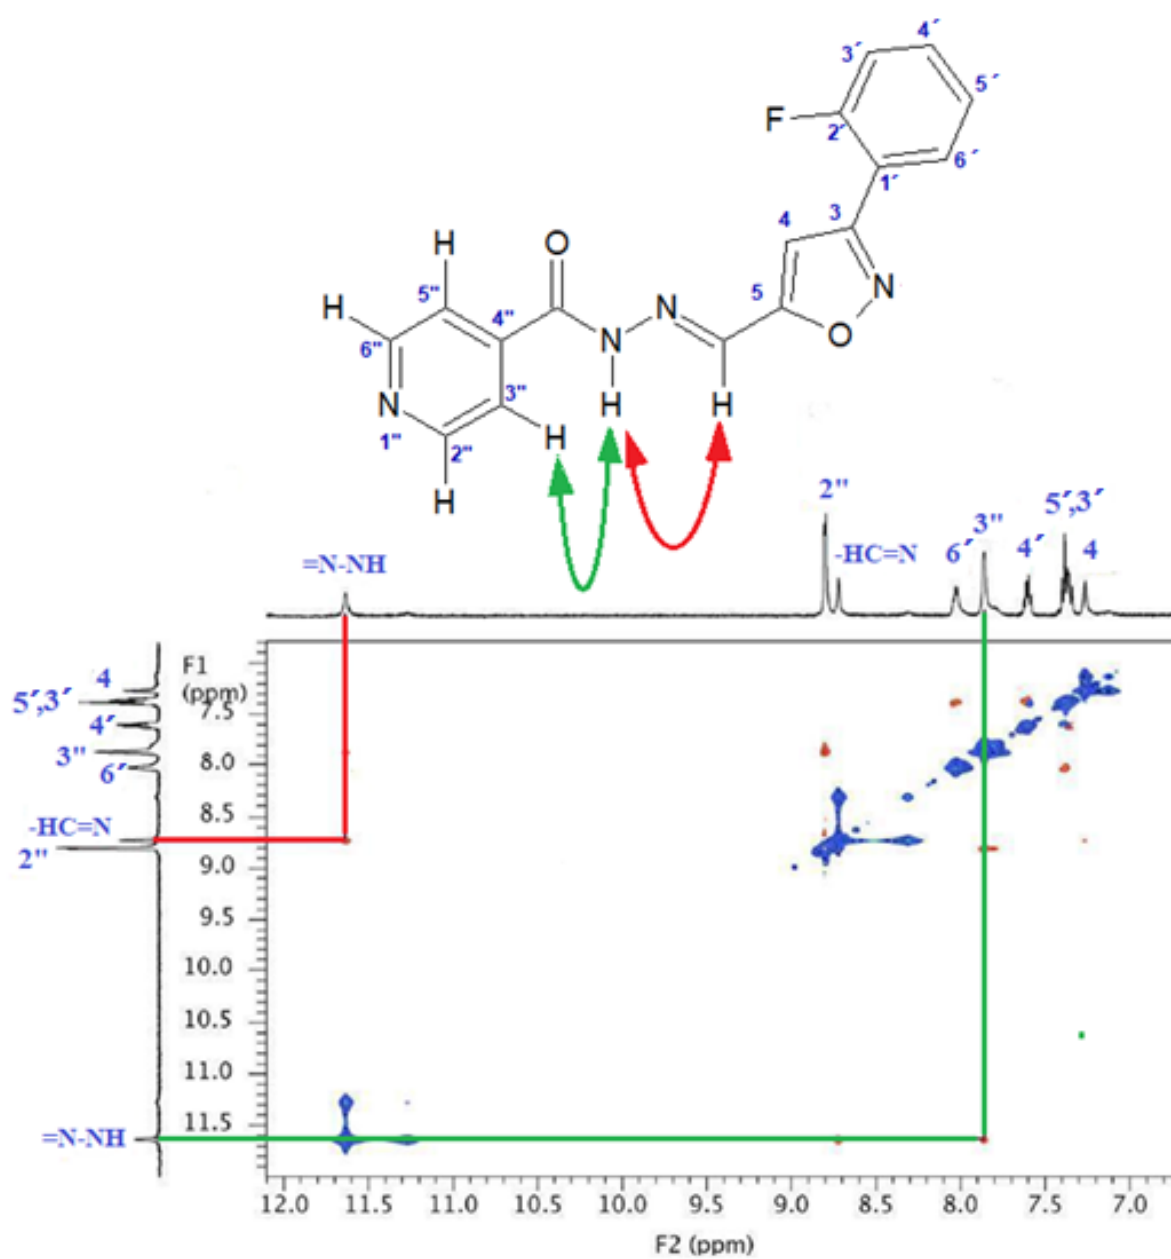

Supplementary figure 8. Two-dimensional  $^1\text{H}$ - $^1\text{H}$  NOESY NMR spectrum, recorded in acetone- $d_6$  for **1**

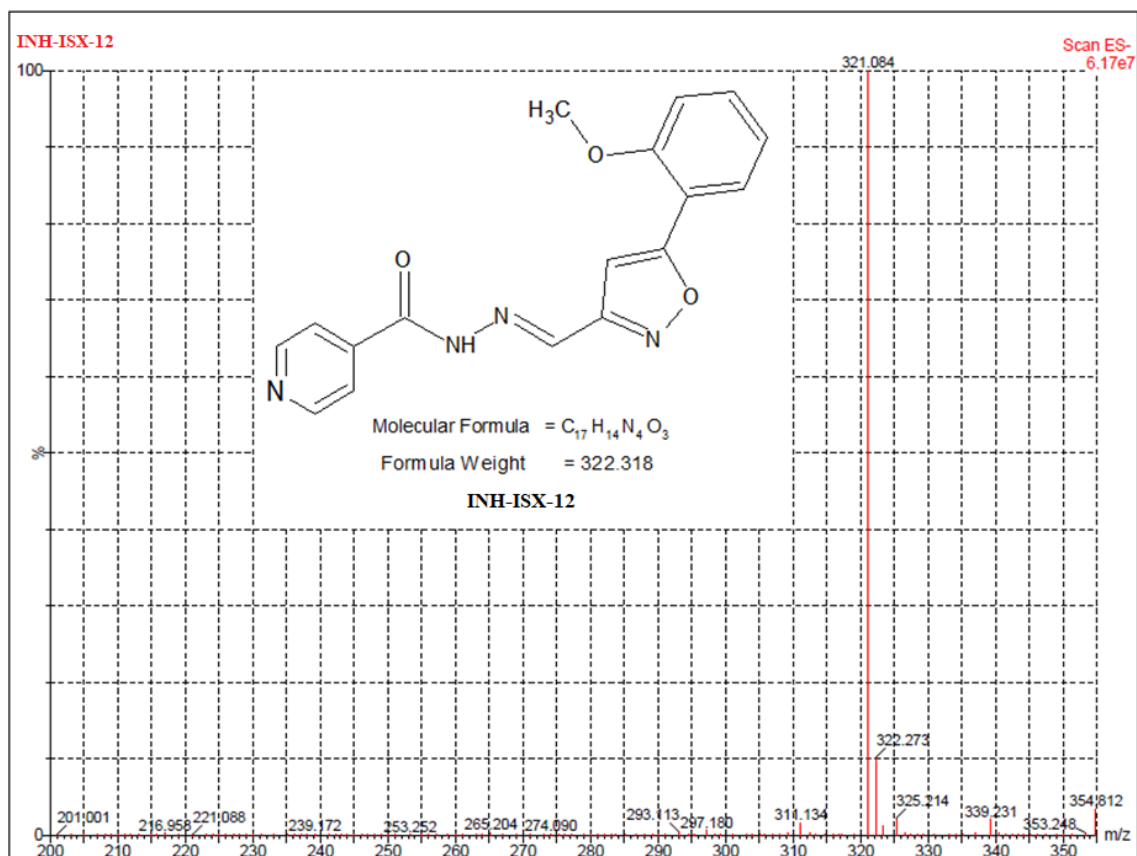

Supplementary figure 9. ESI-mass spectrum of compound 2

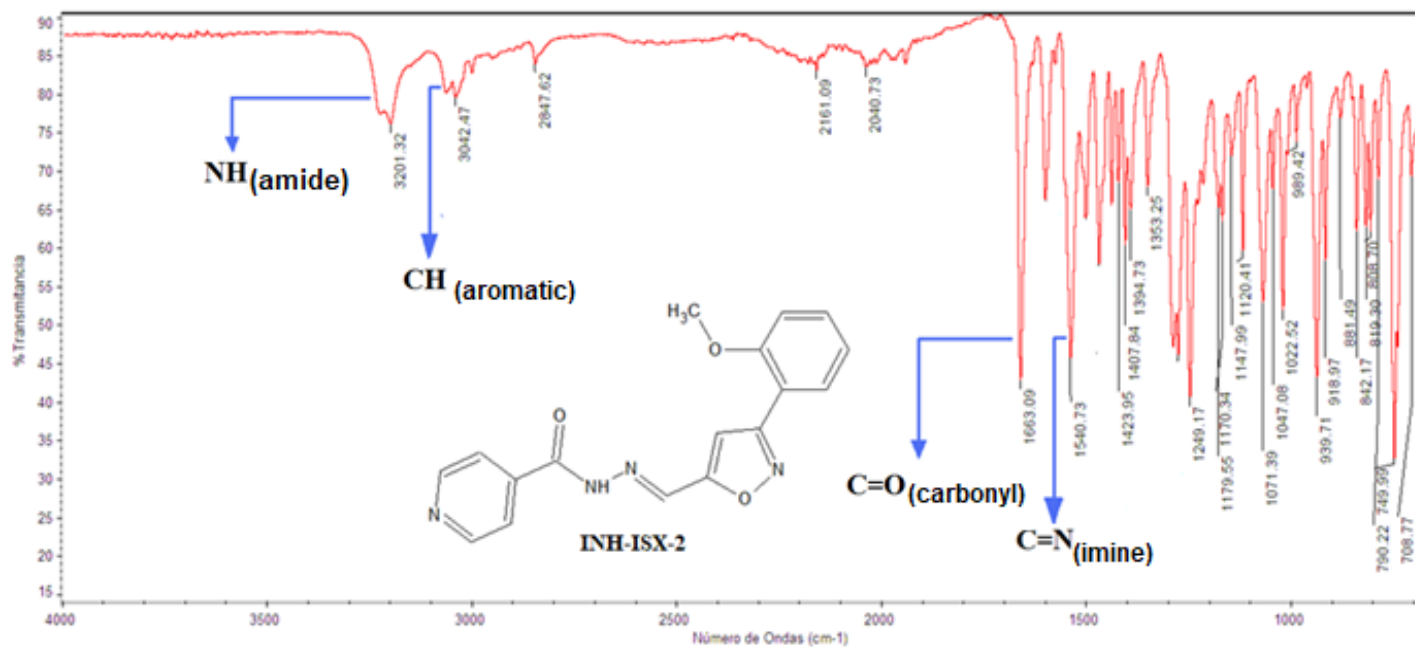

Supplementary figure 10. FT-IR spectrum of compound 2

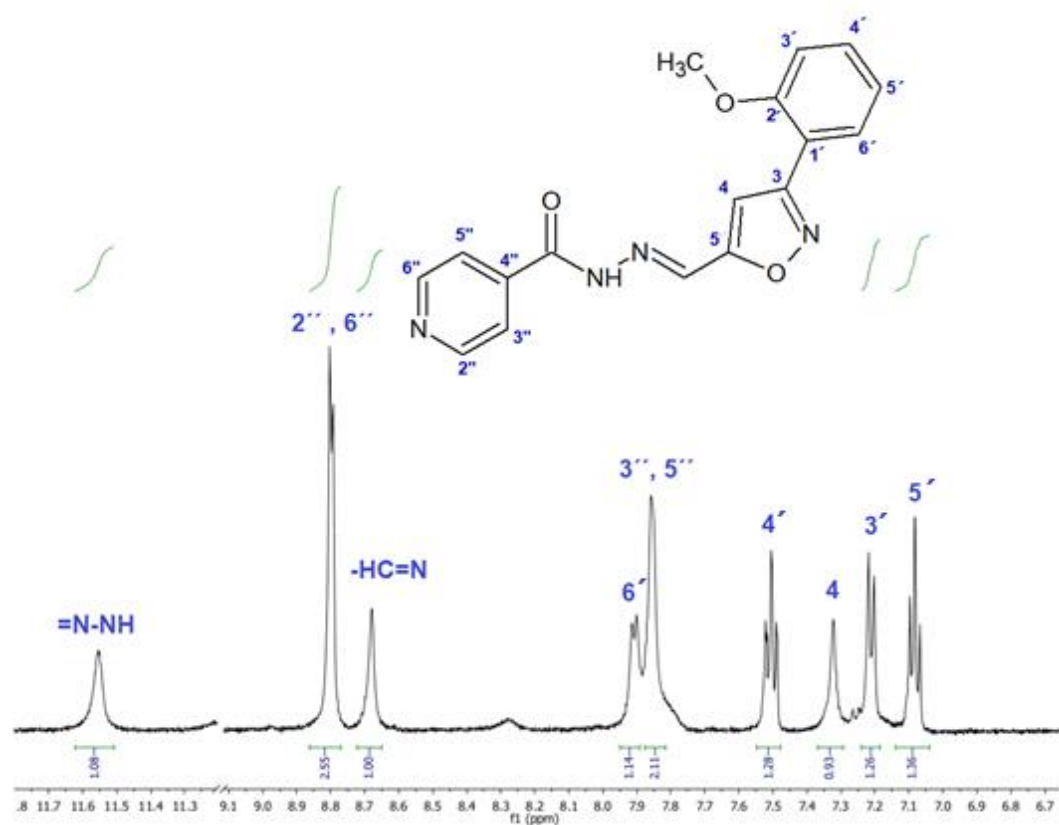

Supplementary figure 11.  $^1\text{H}$  NMR spectrum of compound **2** (500 MHz, acetone- $d_6$ )

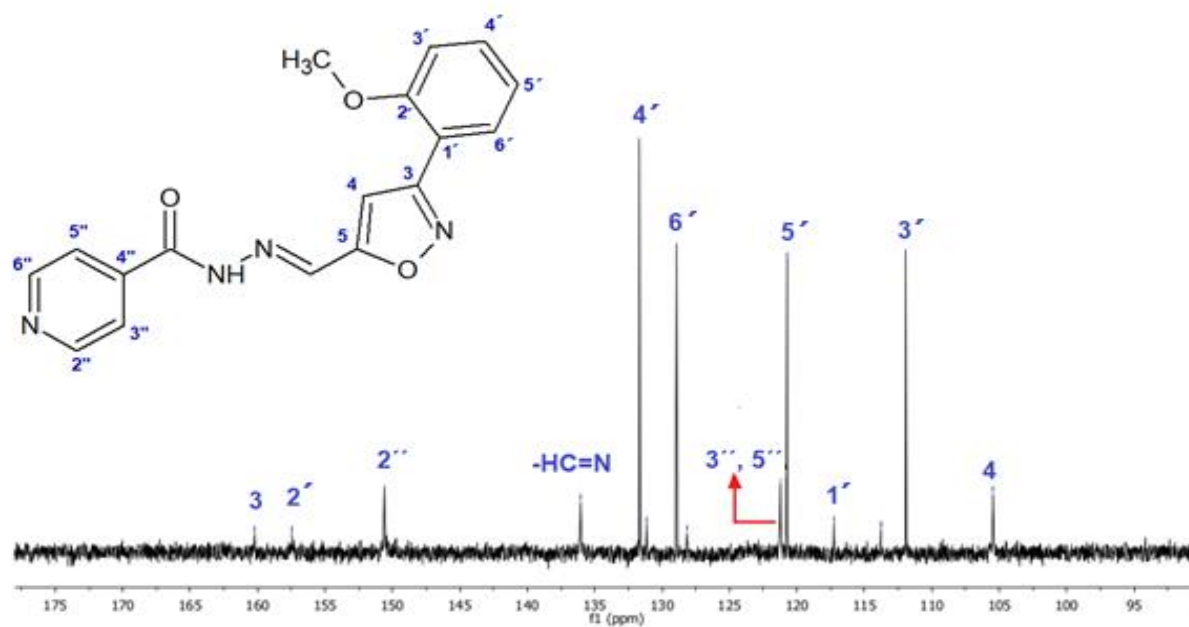

Supplementary figure 12.  $^{13}\text{C}\{^1\text{H}\}$  NMR spectrum of compound **2** (126 MHz, acetone- $d_6$ )

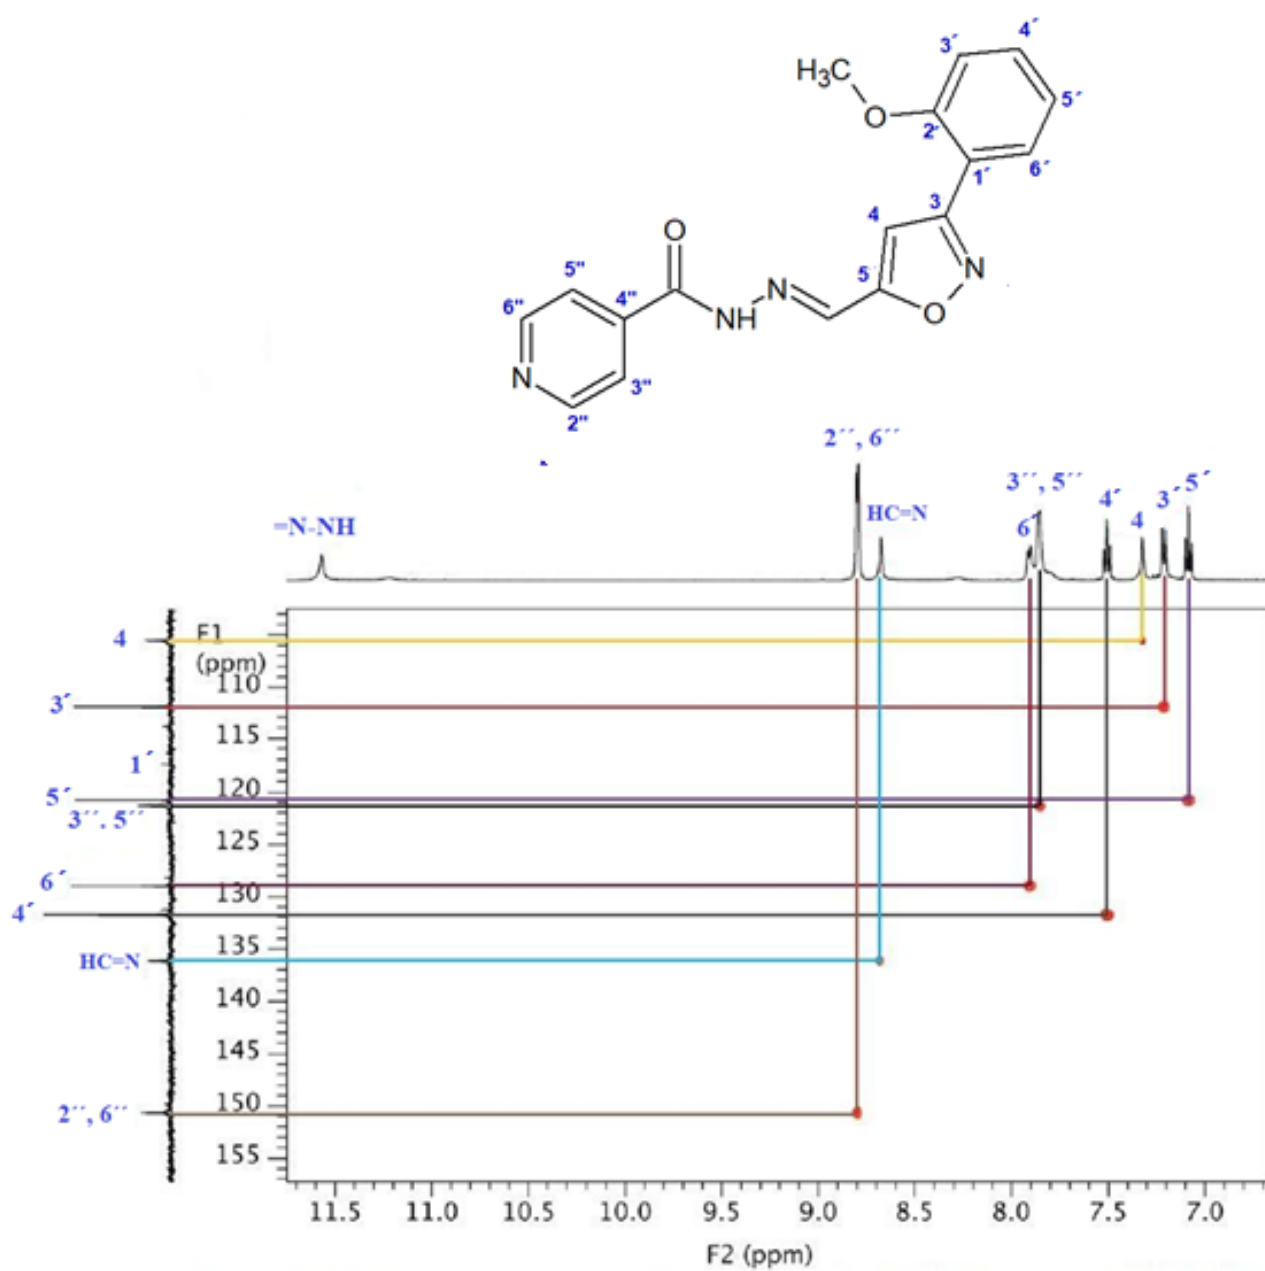

Supplementary figure 13. Two-dimensional  $^1\text{H}$ - $^{13}\text{C}$  HSQC NMR spectrum, recorded in acetone- $d_6$  for **2**

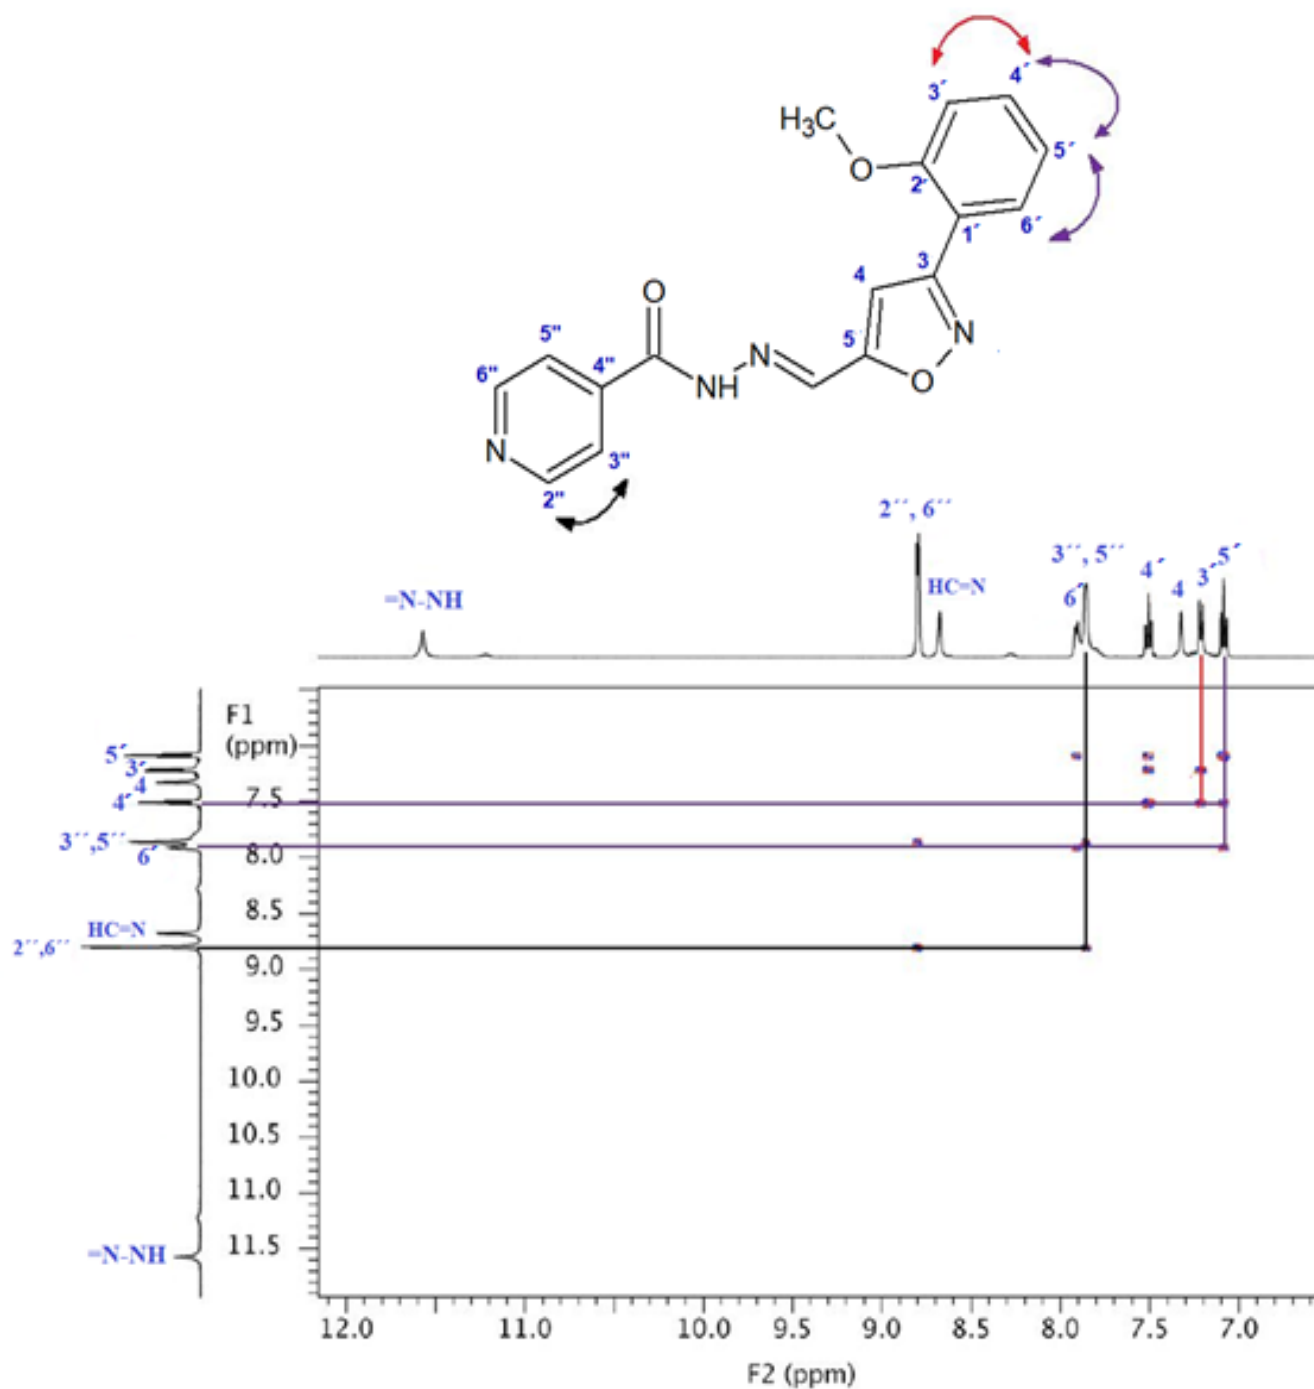

Supplementary figure 14. Two-dimensional <sup>1</sup>H-<sup>1</sup>H DQFCOSY NMR spectrum, recorded in acetone-*d*<sub>6</sub> for **2**

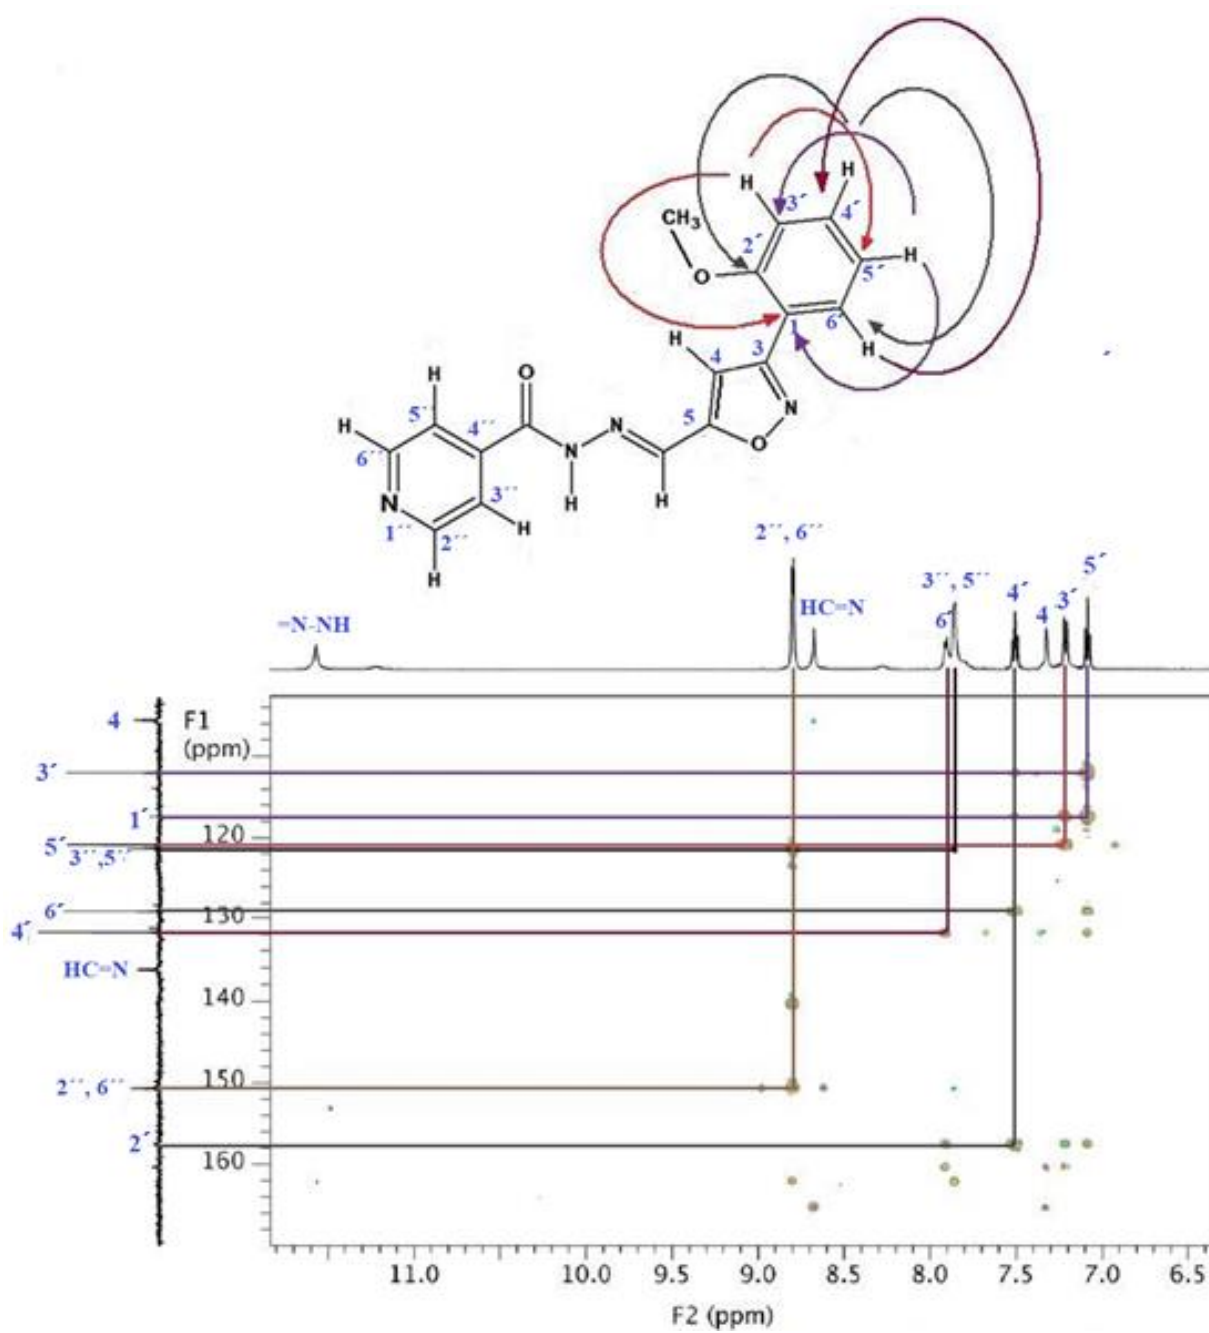

Supplementary figure 15. Two-dimensional  $^1\text{H}$ - $^{13}\text{C}$  HMBC NMR spectrum recorded, in acetone- $d_6$

for **2**

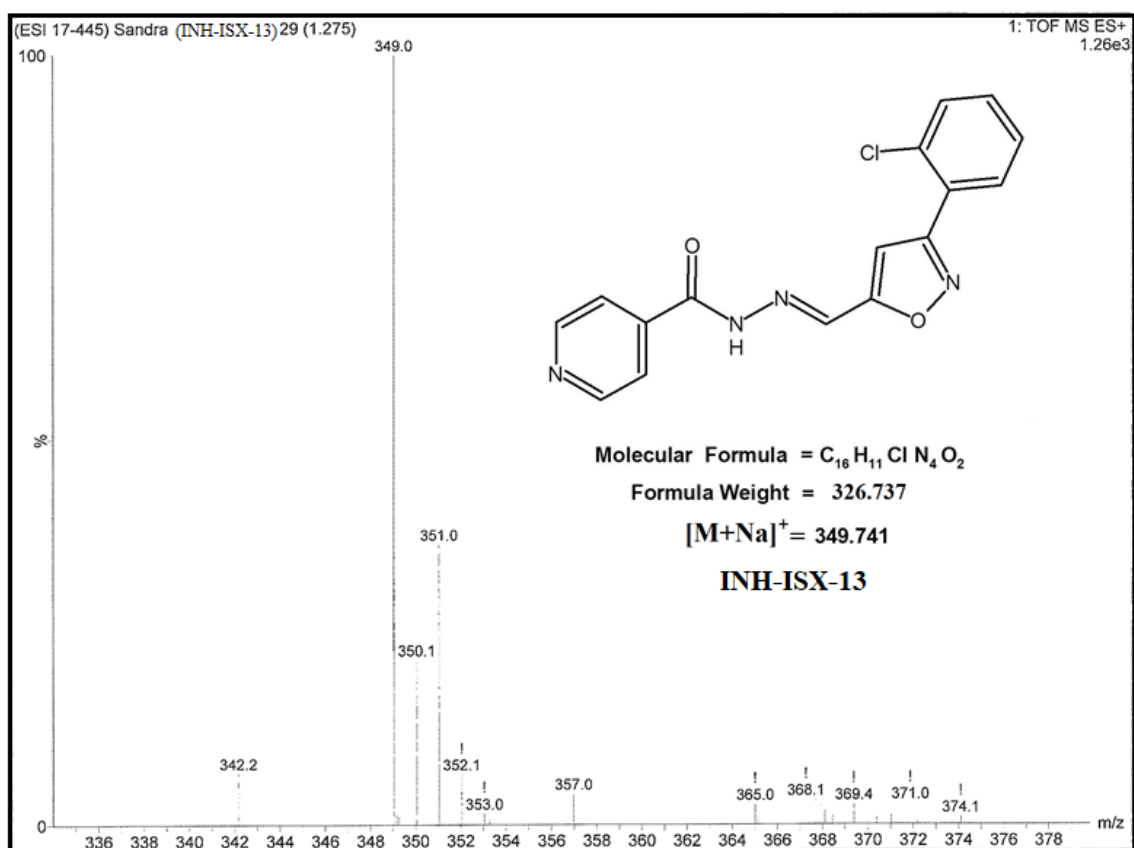

Supplementary figure 16. ESI-mass spectrum of compound **3**

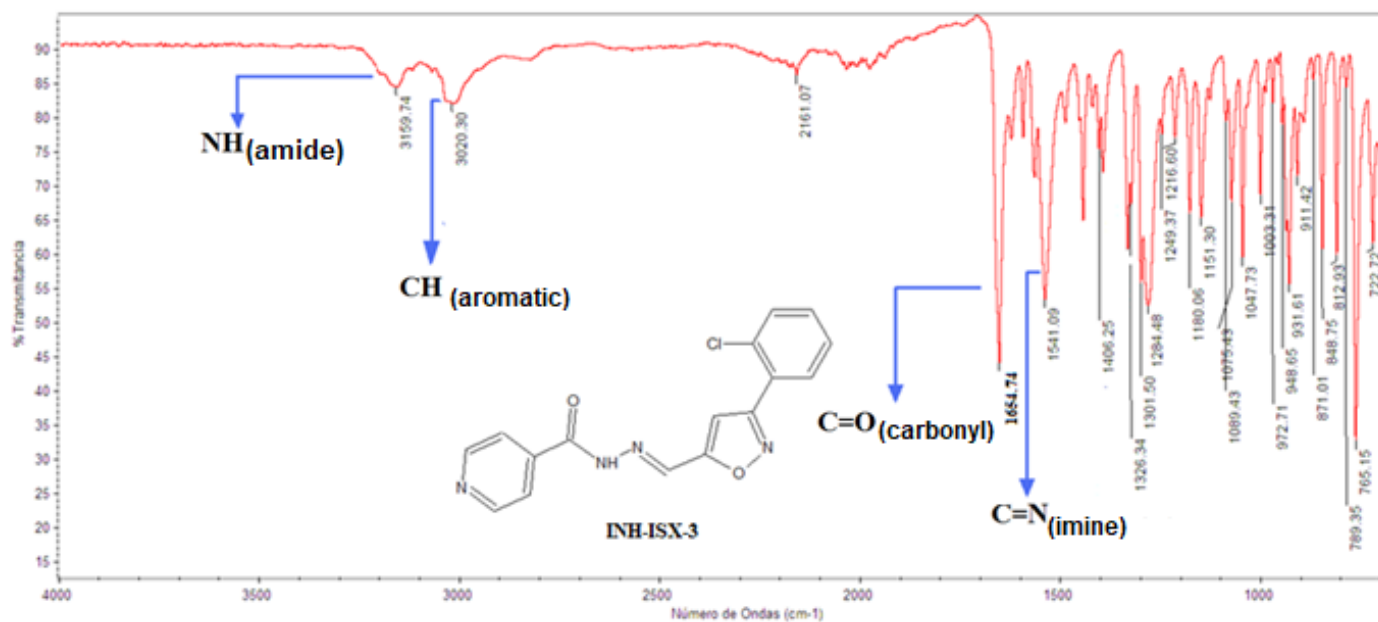

Supplementary figure 17. FT-IR spectrum of compound **3**

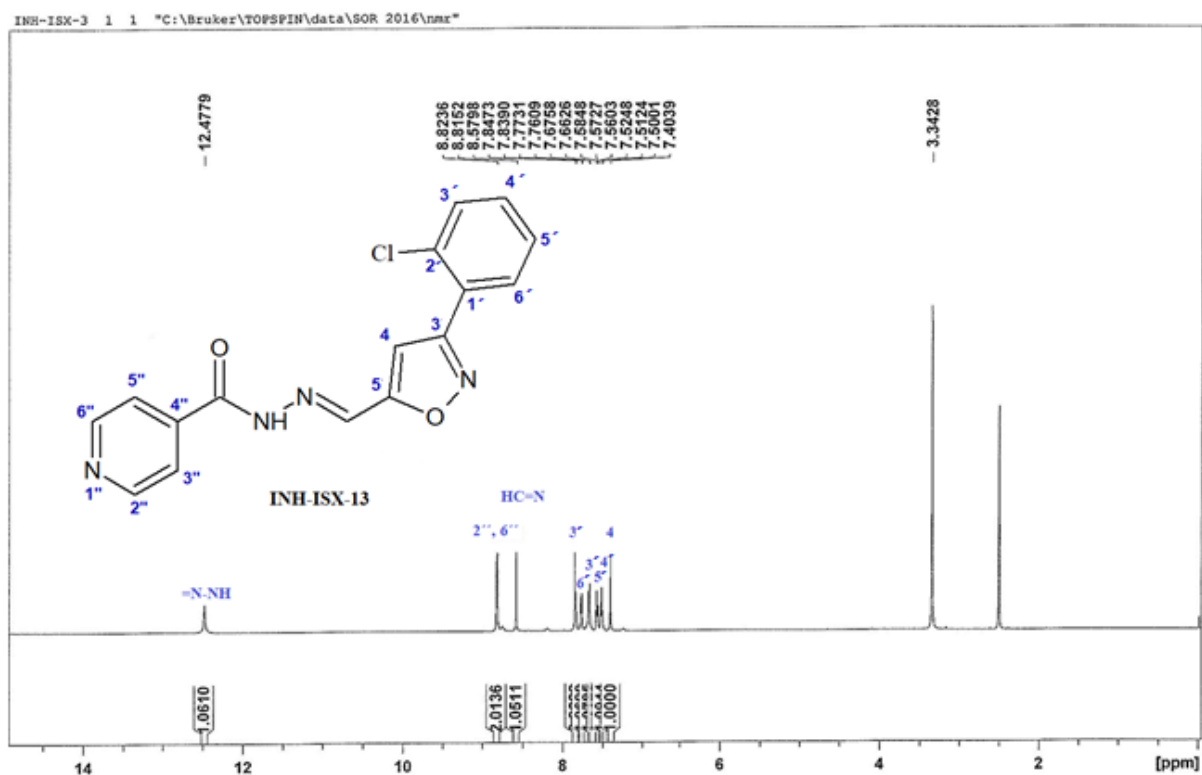

Supplementary figure 18.  $^1\text{H}$  NMR spectrum of compound **3** (600 MHz,  $\text{DMSO}-d_6$ )

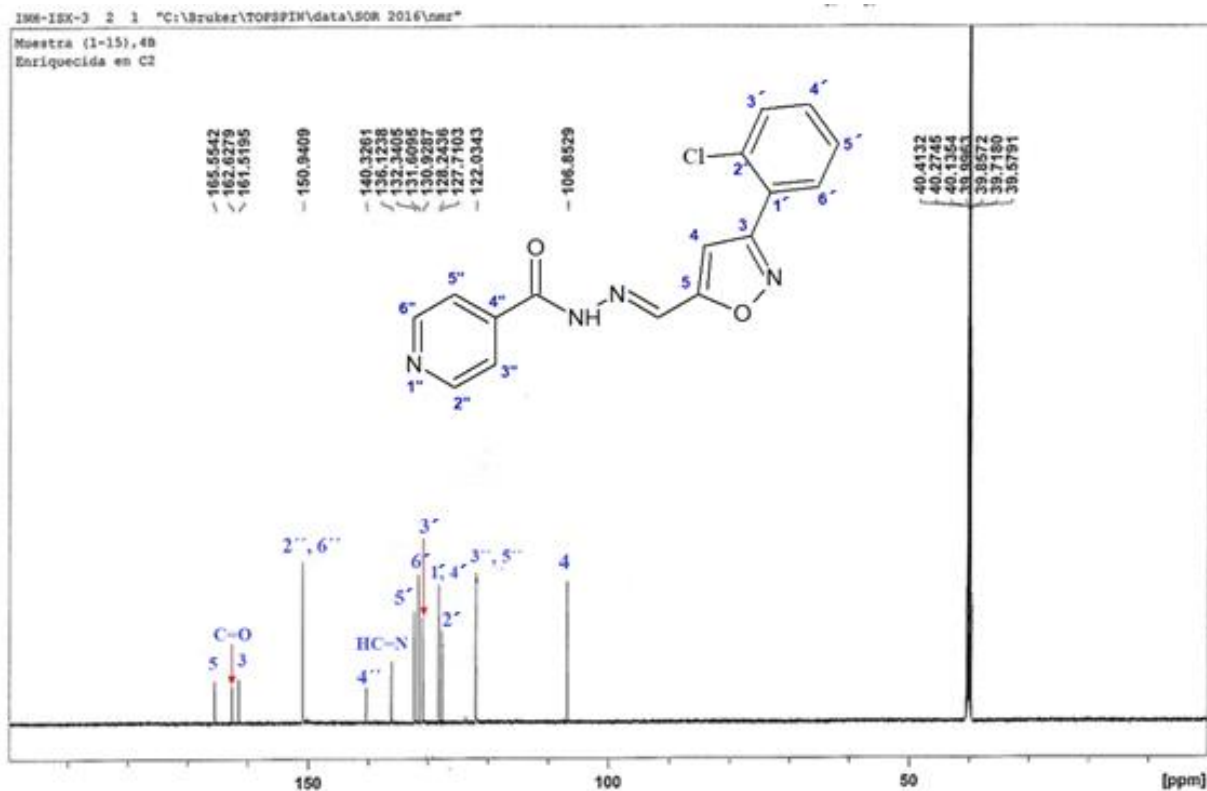

Supplementary figure 19.  $^{13}\text{C}$  NMR spectrum of compound **3** (150 MHz,  $\text{DMSO}-d_6$ )



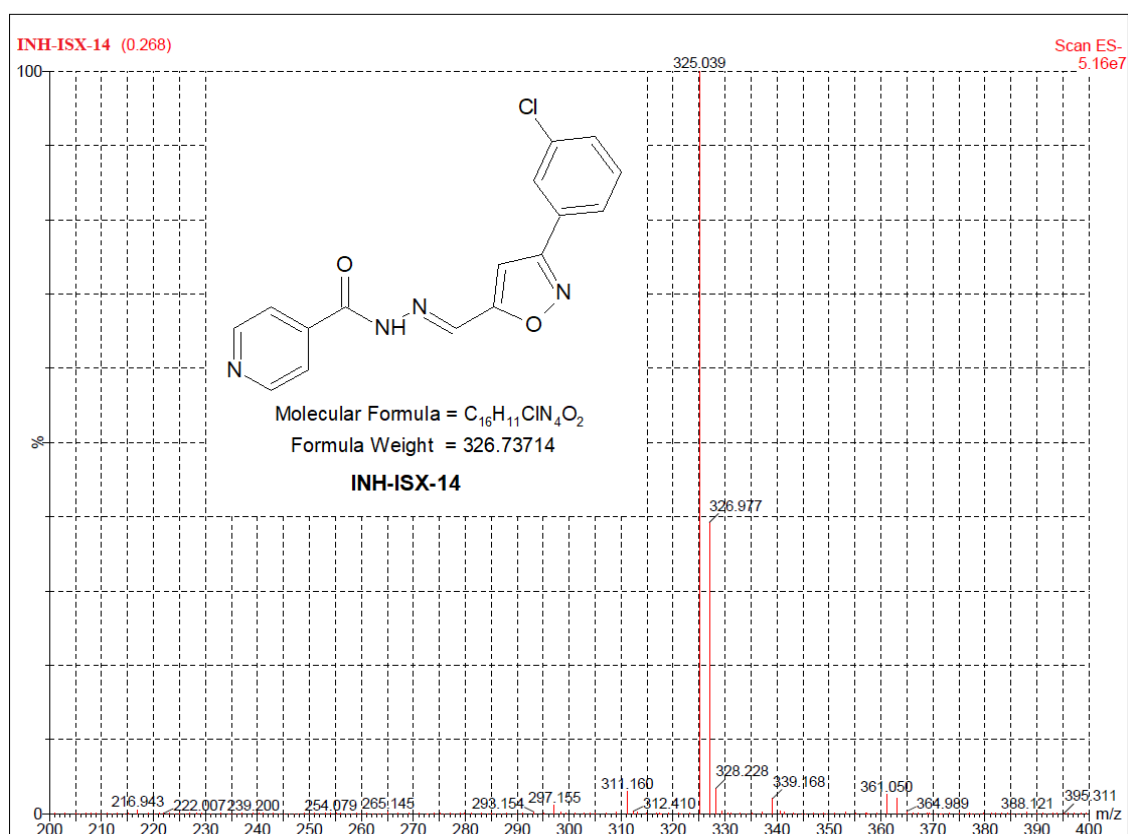

Supplementary figure 20. ESI-mass spectrum of compound **4**

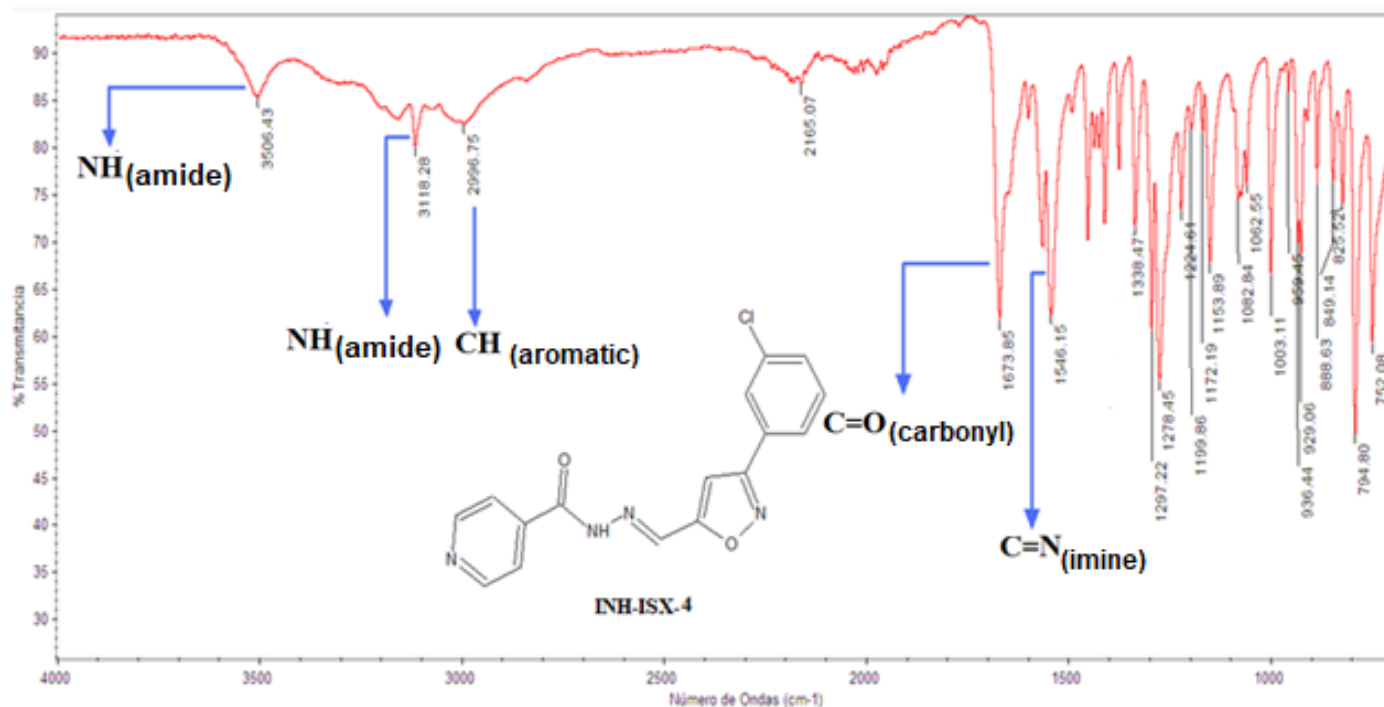

Supplementary figure 21. FT-IR spectrum of compound **4**

<sup>1</sup>H UAQ-I-69-3 en DMSO-d<sub>6</sub> a 25C  
7mg de INH-ISX-14 en 600ul de DMSO-d<sub>6</sub>

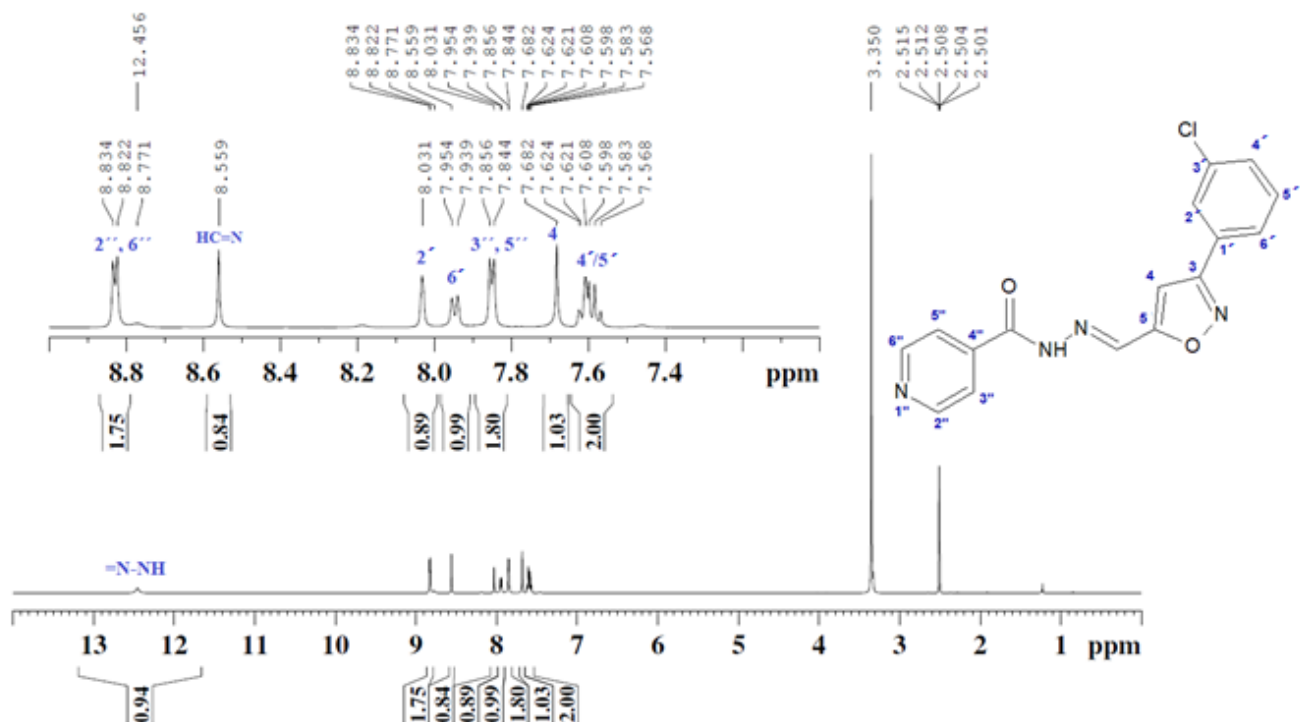

Supplementary figure 22. <sup>1</sup>H NMR spectrum of compound **4** (500 MHz, DMSO-*d*<sub>6</sub>)

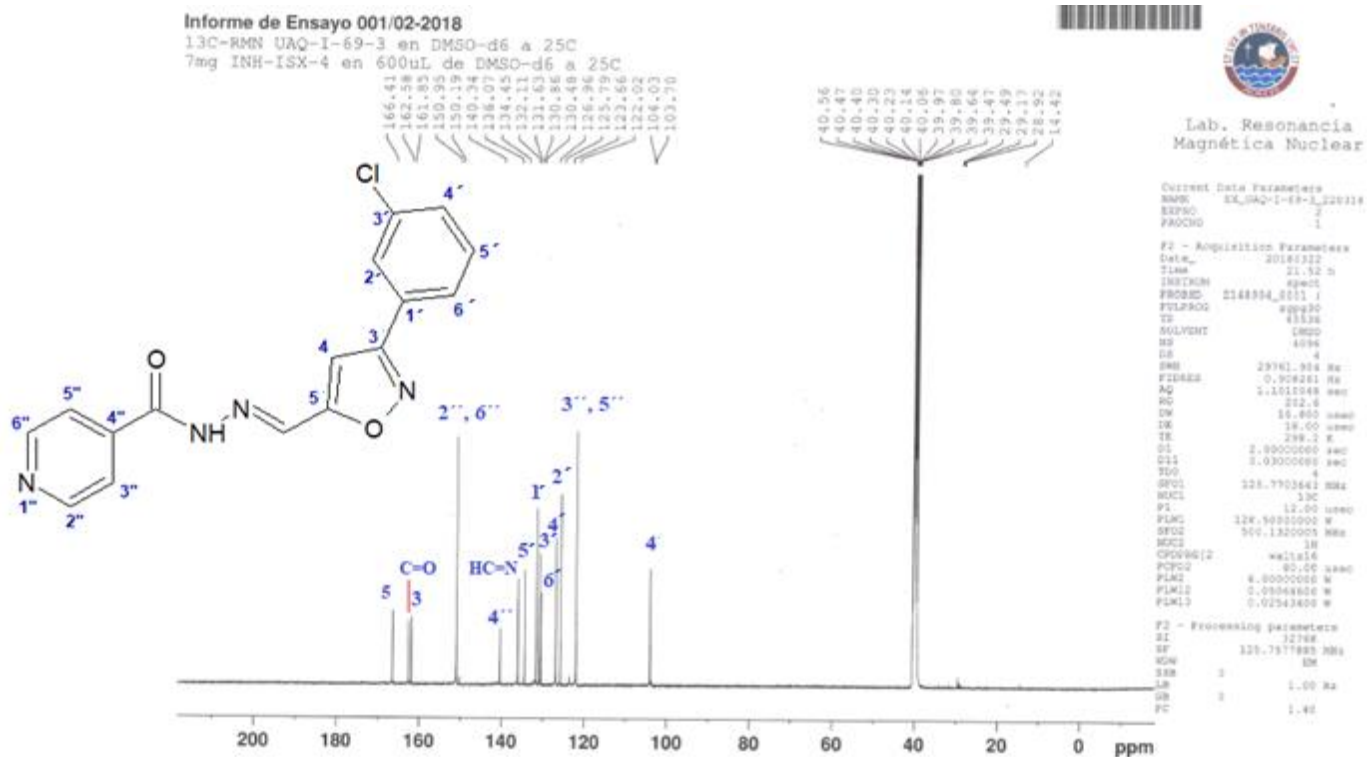

Supplementary figure 23. <sup>13</sup>C NMR spectrum of compound **4** (1250 MHz, DMSO-*d*<sub>6</sub>)

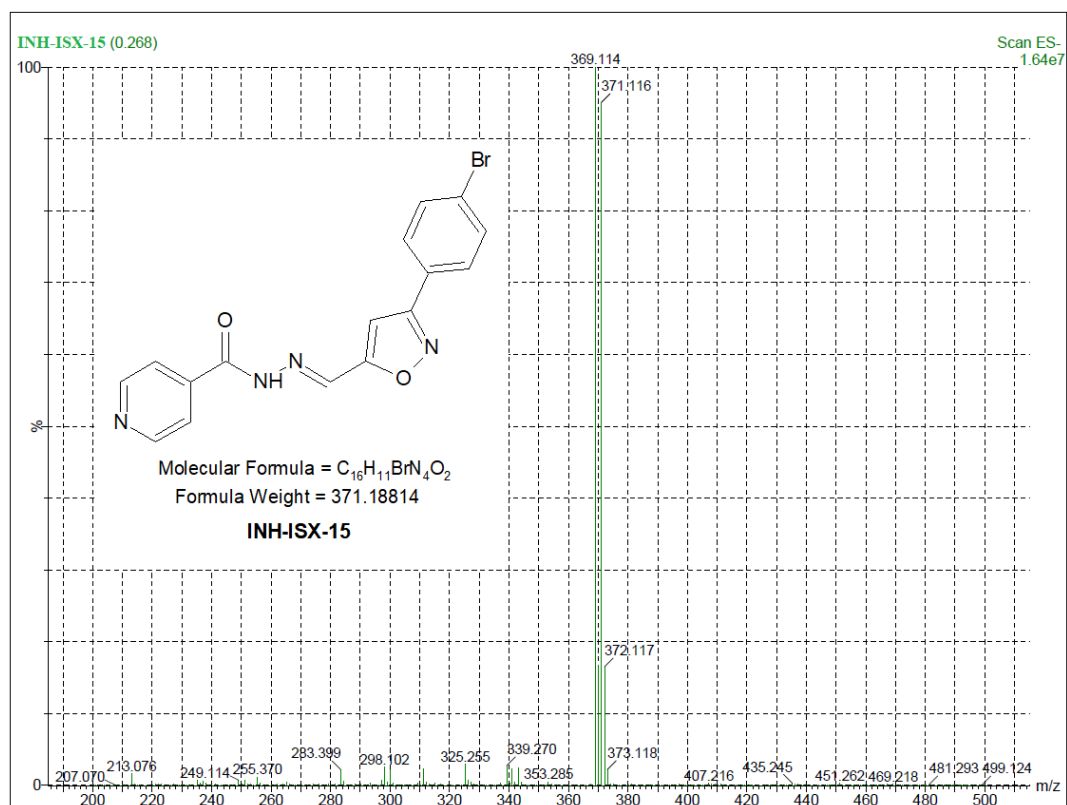

Supplementary figure 24. ESI-mass spectrum of compound **5**

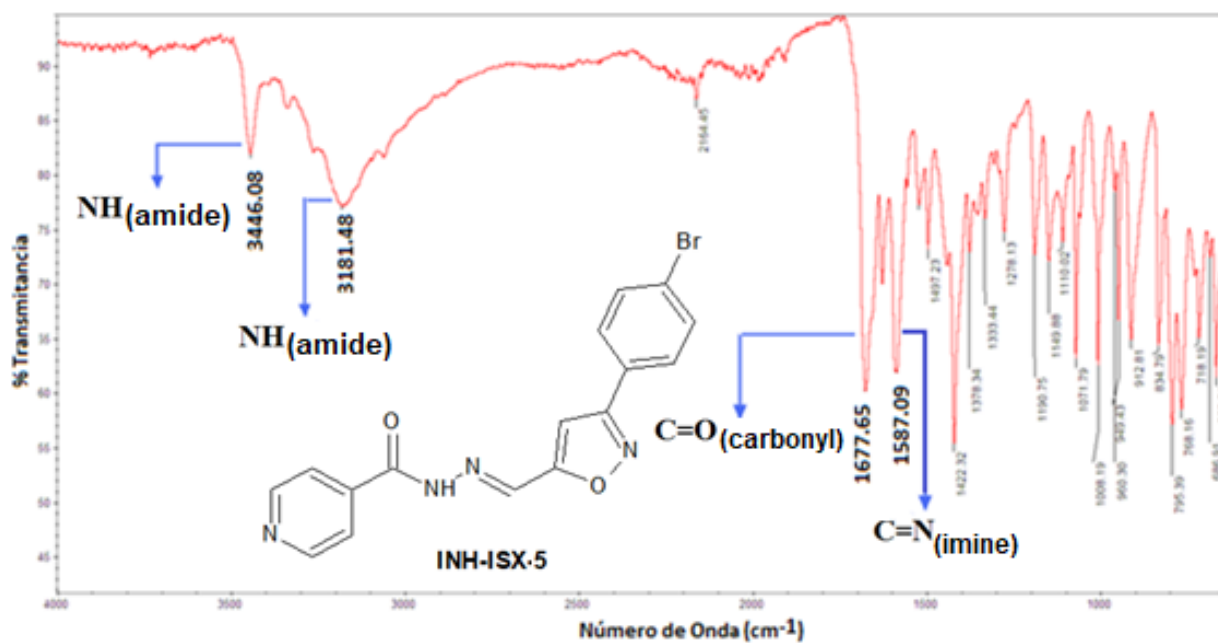

Supplementary figure 25. FT-IR spectrum of compound **5**

<sup>1</sup>H UAQ-I-69-4 en DMSO-d<sub>6</sub> a 25C  
7mg de INH-ISX-15 en 600ul de DMSO-d<sub>6</sub>

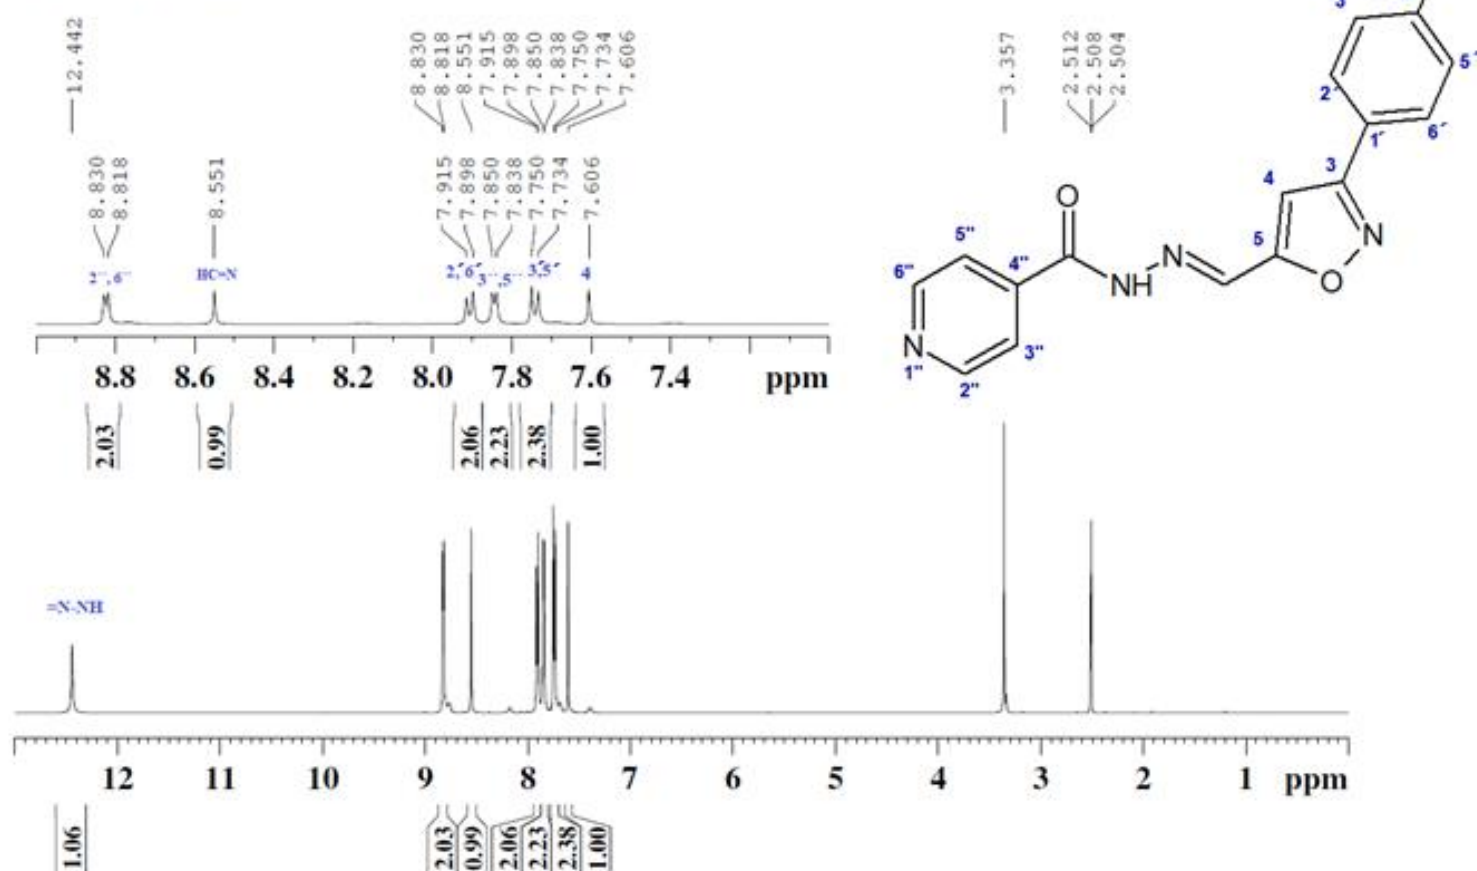

Supplementary figure 26. <sup>1</sup>H NMR spectrum of compound 5 (500 MHz, DMSO-*d*<sub>6</sub>)

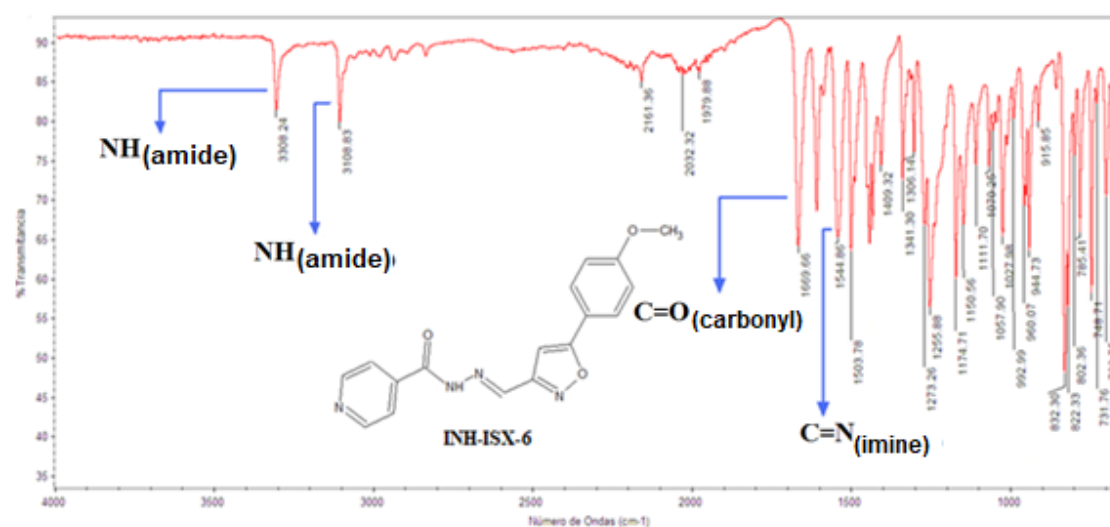

Supplementary figure 27. FT-IR spectrum of compound 6

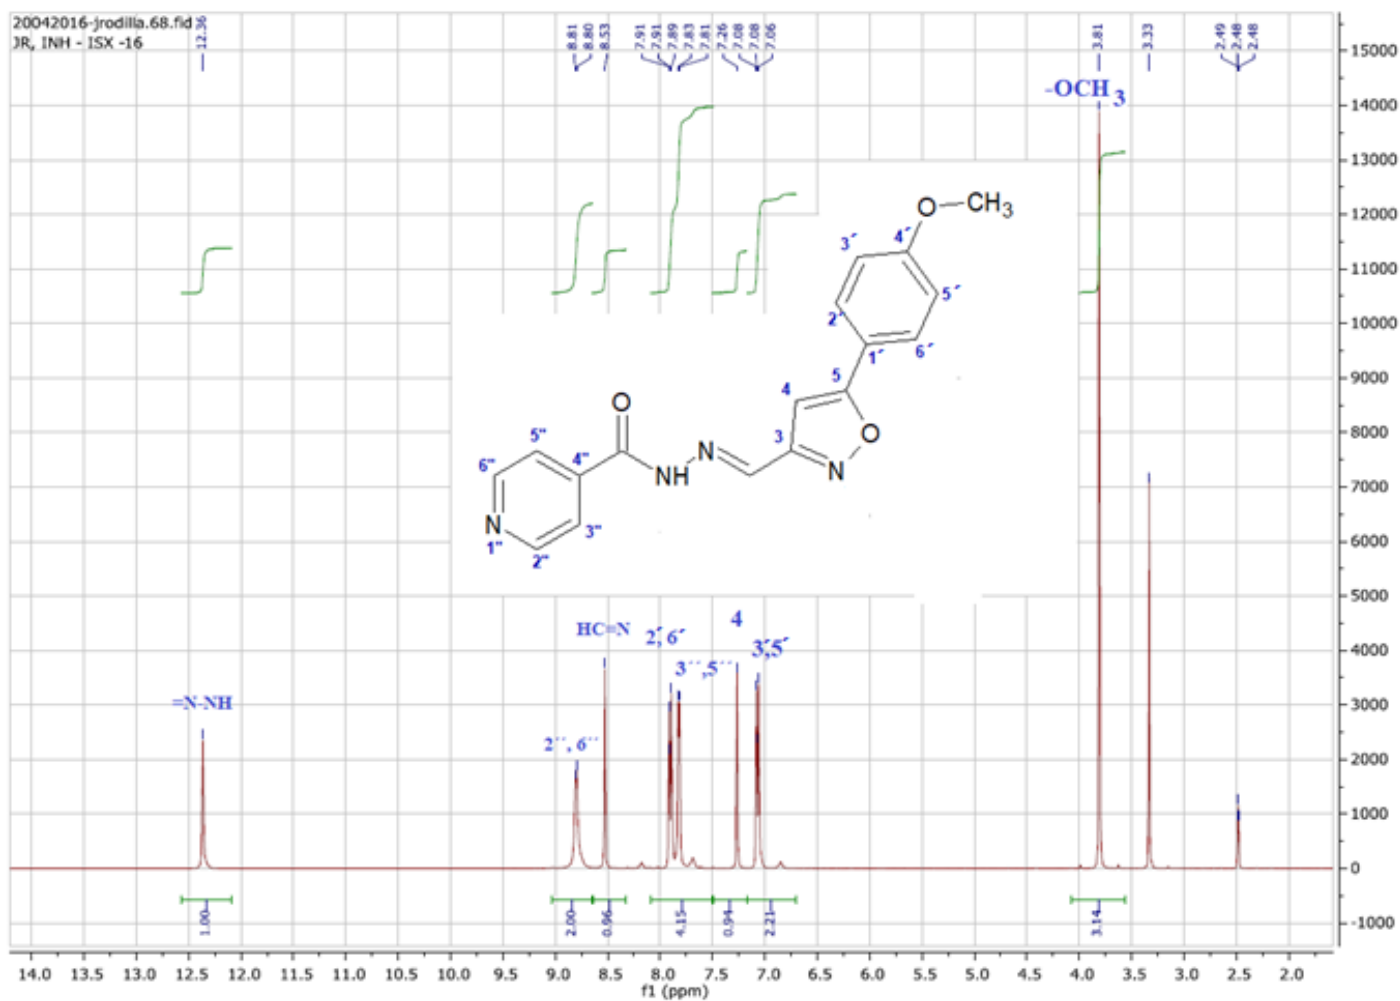

Supplementary figure 28. <sup>1</sup>H NMR spectrum of compound **6** (400 MHz, DMSO-*d*<sub>6</sub>)

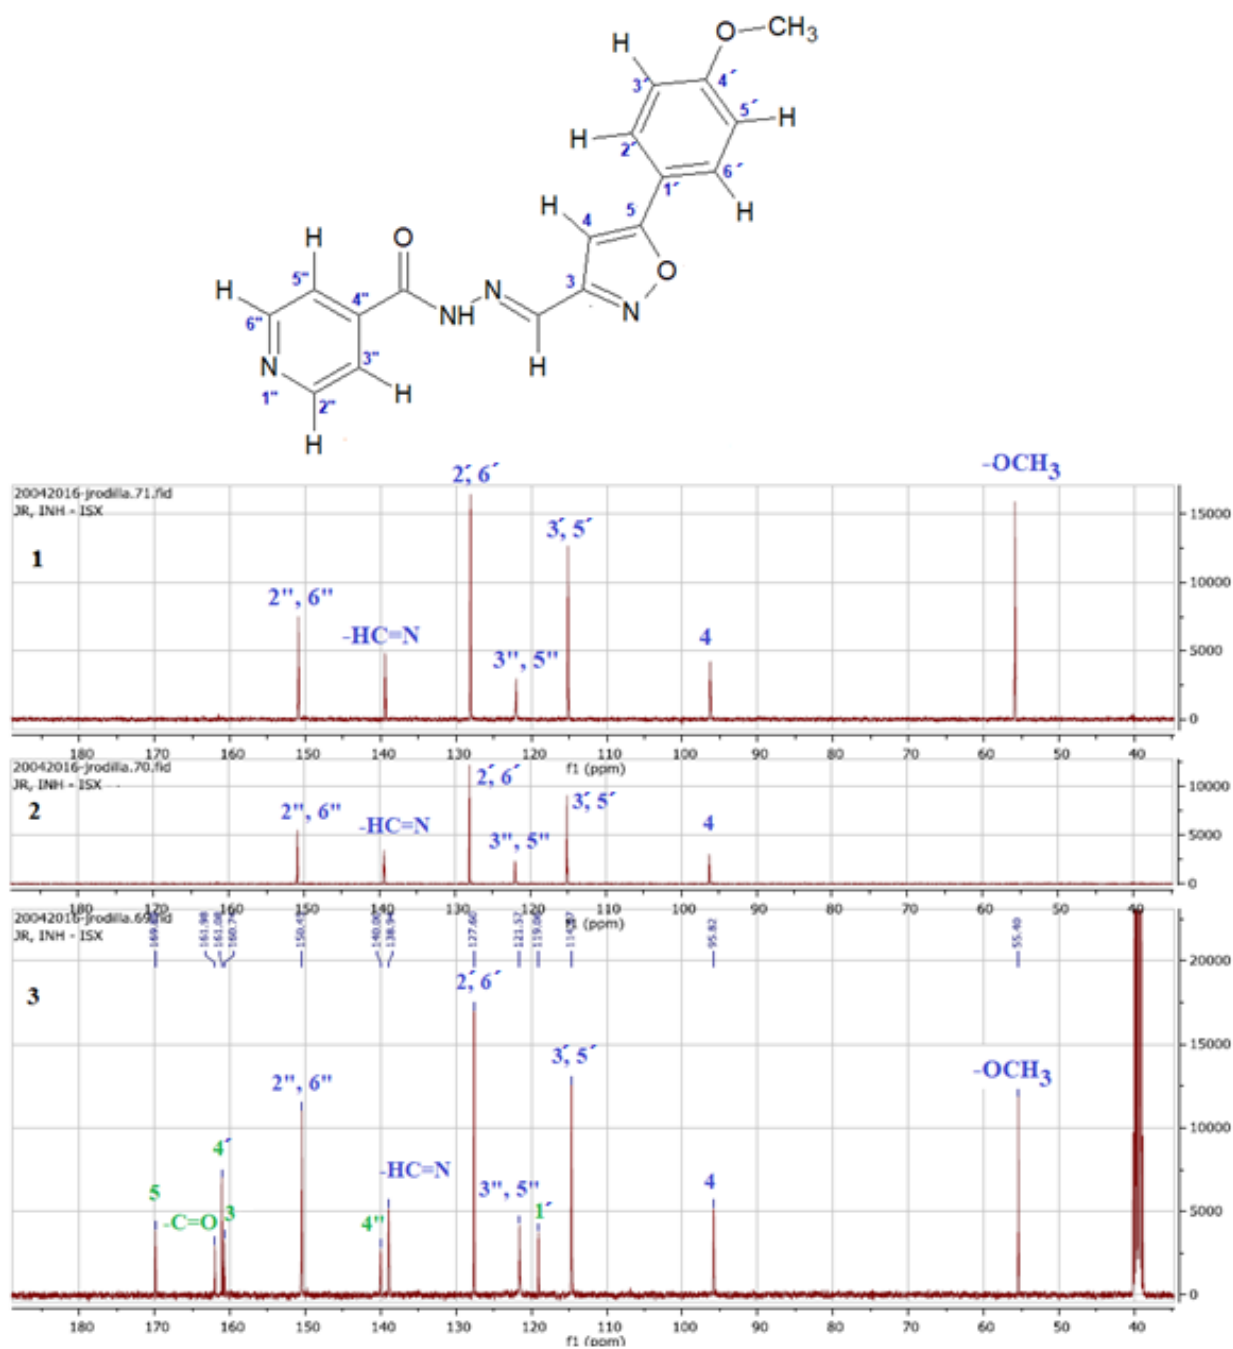

Supplementary figure 29. NMR spectrum of compound **6** (100MHz, DMSO-d<sub>6</sub>) 1)

DEPT-45 2) DEPT -90 3) 13C NMR.

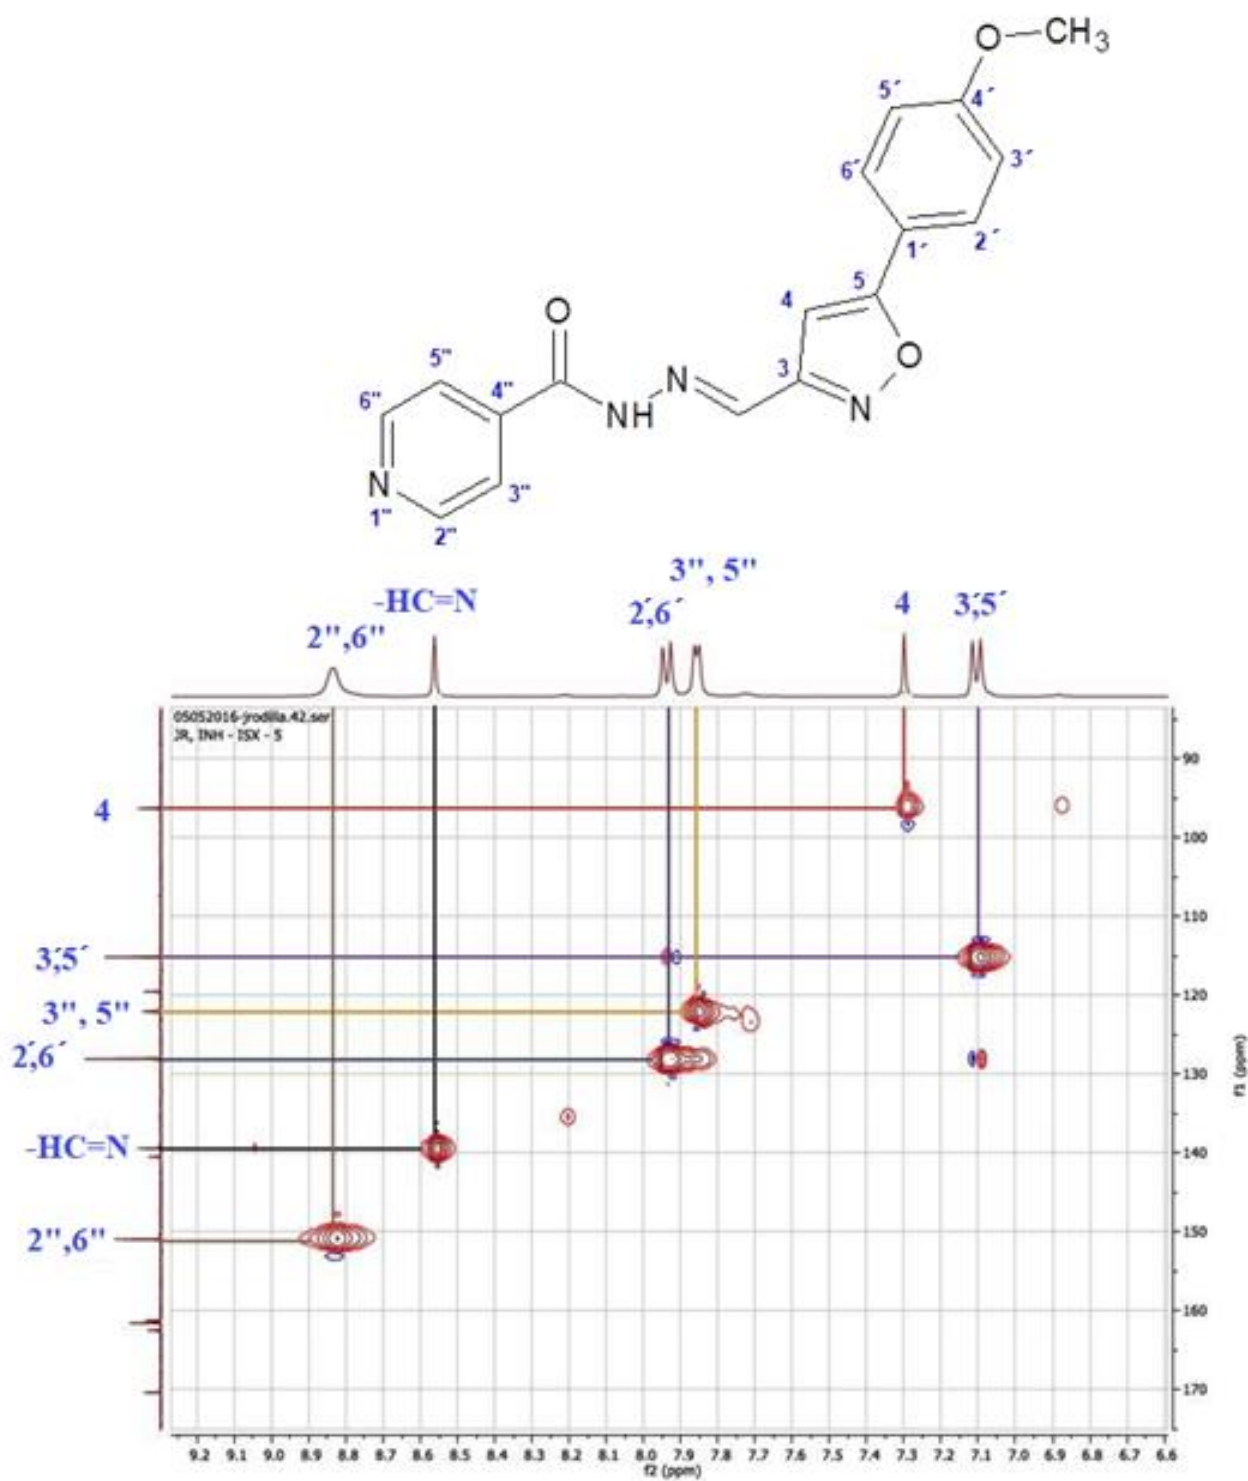

Supplementary figure 30. Two-dimensional <sup>1</sup>H-<sup>13</sup>C HSQC NMR spectrum, recorded in DMSO-*d*<sub>6</sub> for **6**

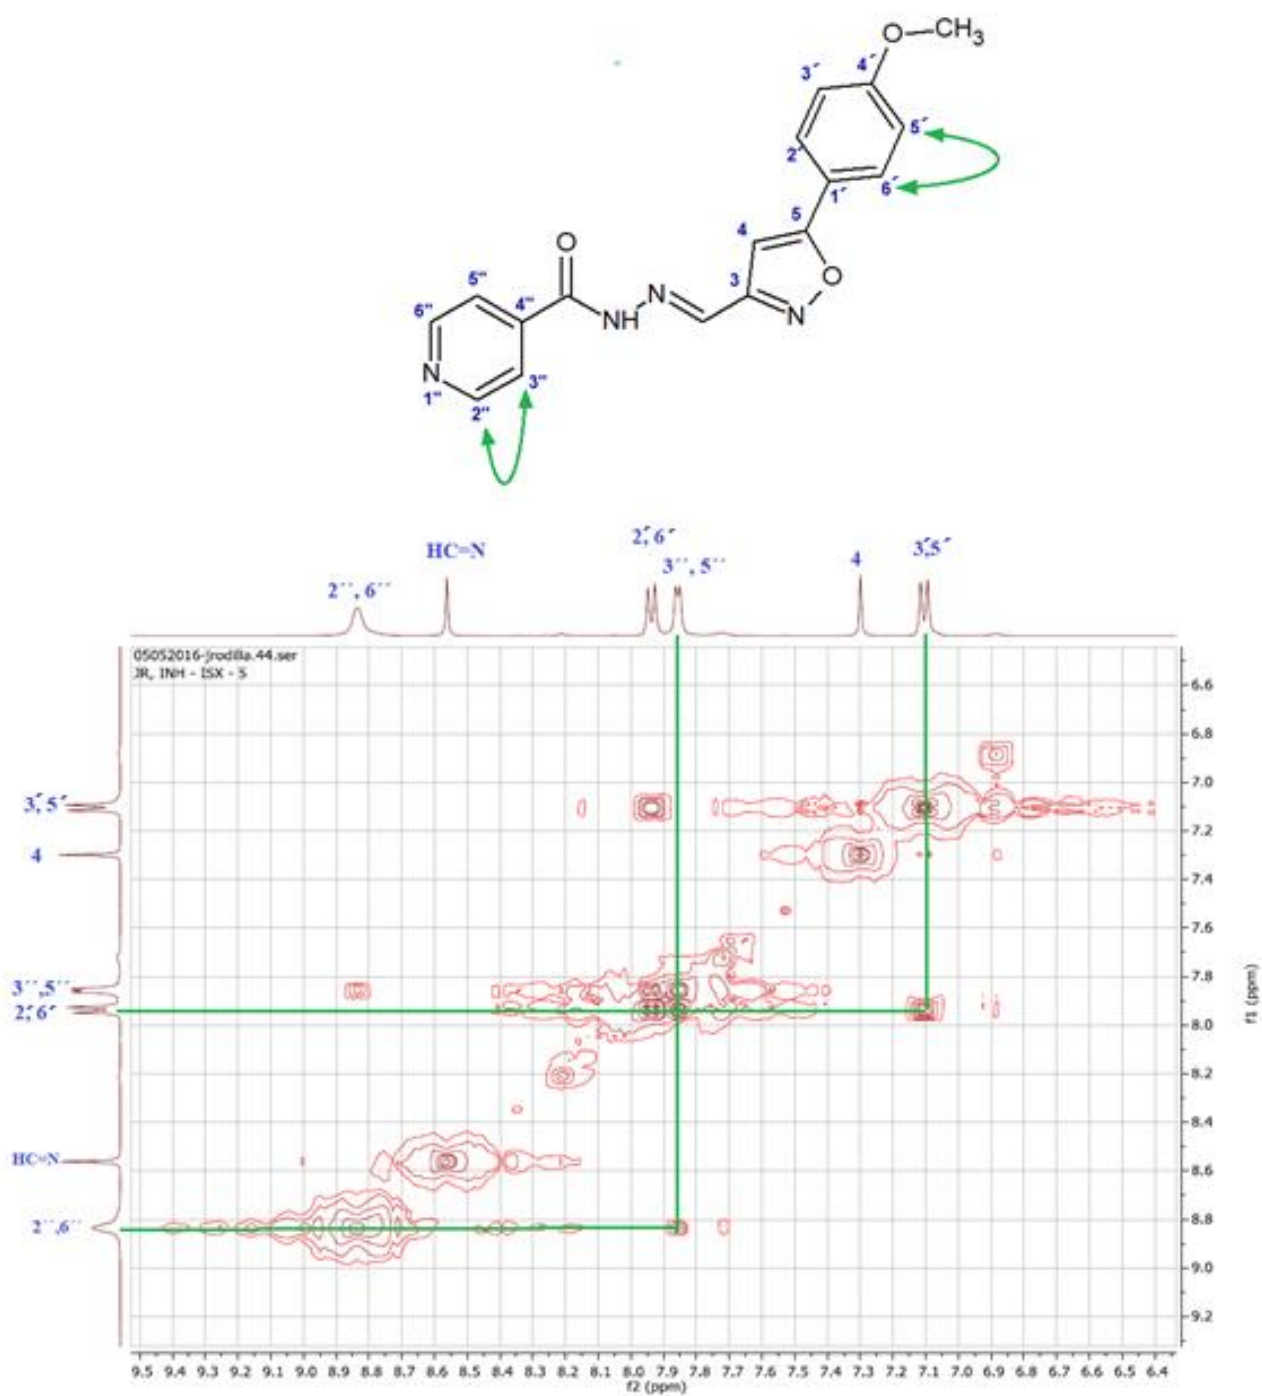

Supplementary figure 31. Two-dimensional  $^1\text{H}$ - $^1\text{H}$  COSY NMR spectrum, recorded in  $\text{DMSO}-d_6$  for **6**



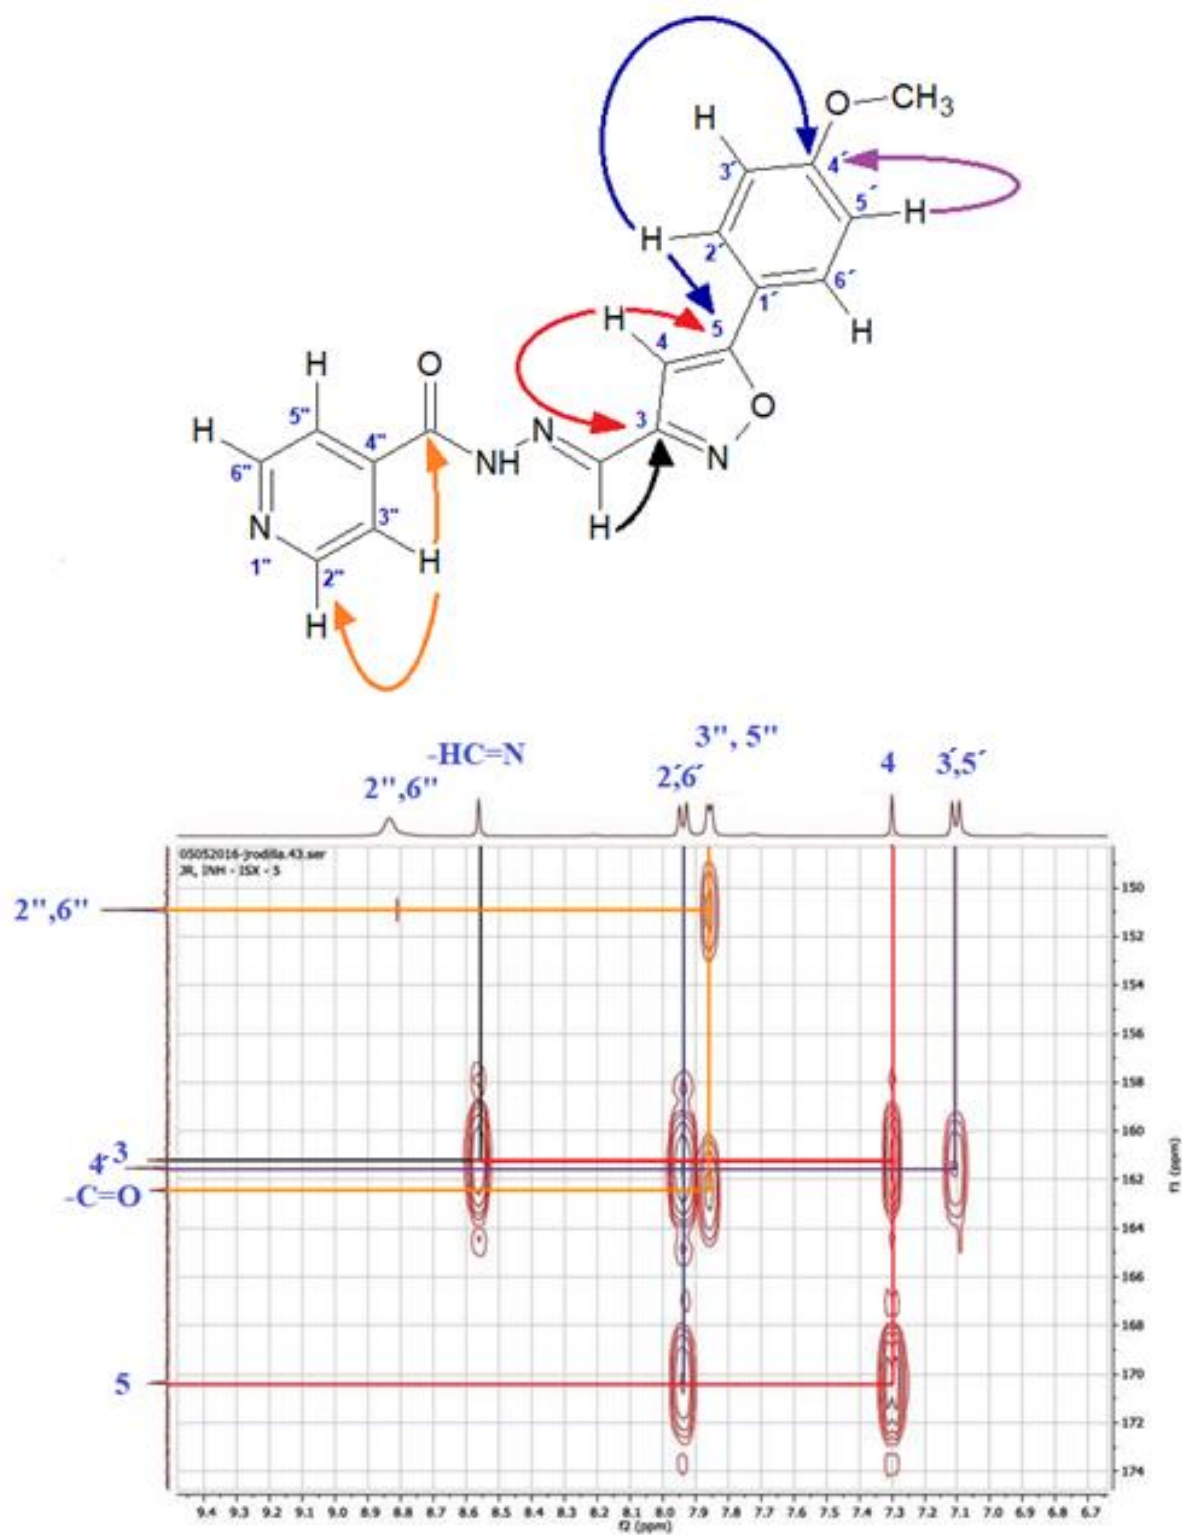

Supplementary figure 32. Two-dimensional  $^1\text{H}$ - $^{13}\text{C}$  HMBC NMR spectrum recorded in  $\text{DMSO}-d_6$  for **6**

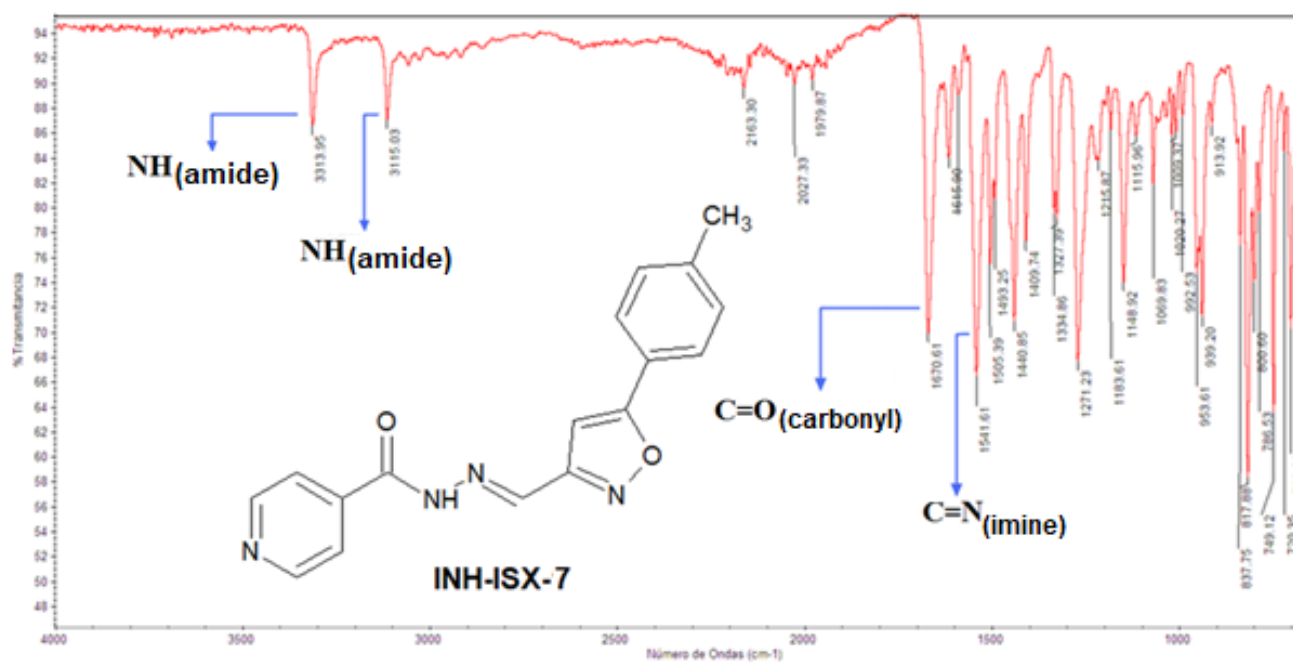

Supplementary figure 33. FT-IR spectrum of compound 7

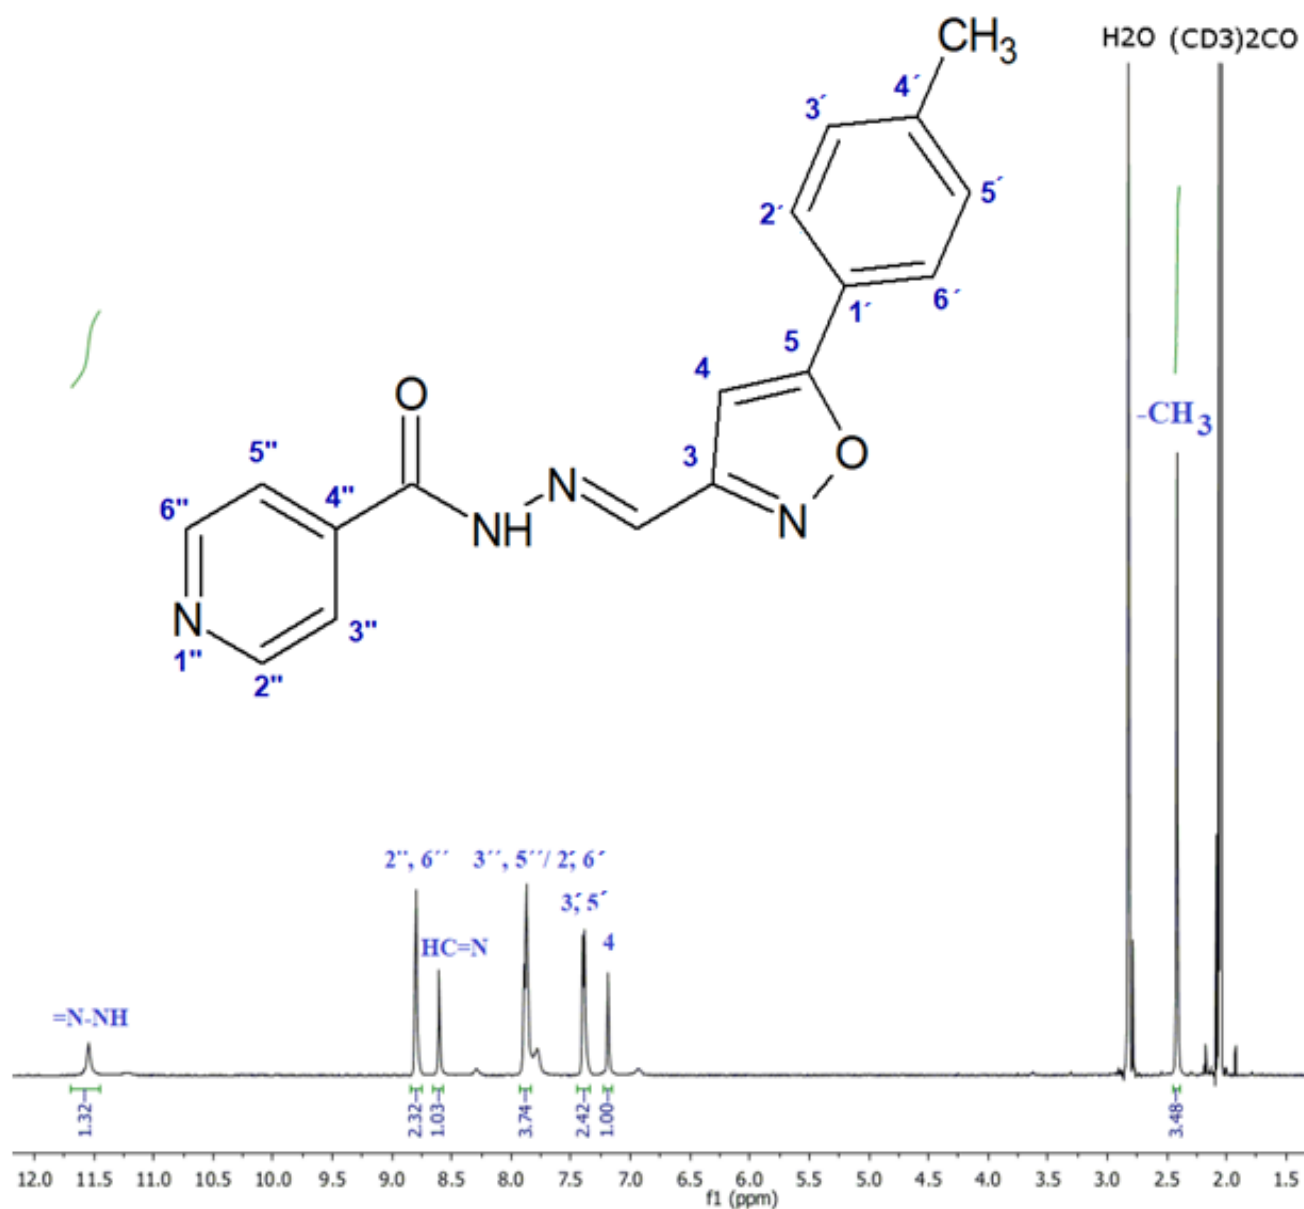

Supplementary figure 34.  $^1\text{H}$  NMR spectrum of compound **7** (500 MHz, acetone-*d*<sub>6</sub>)

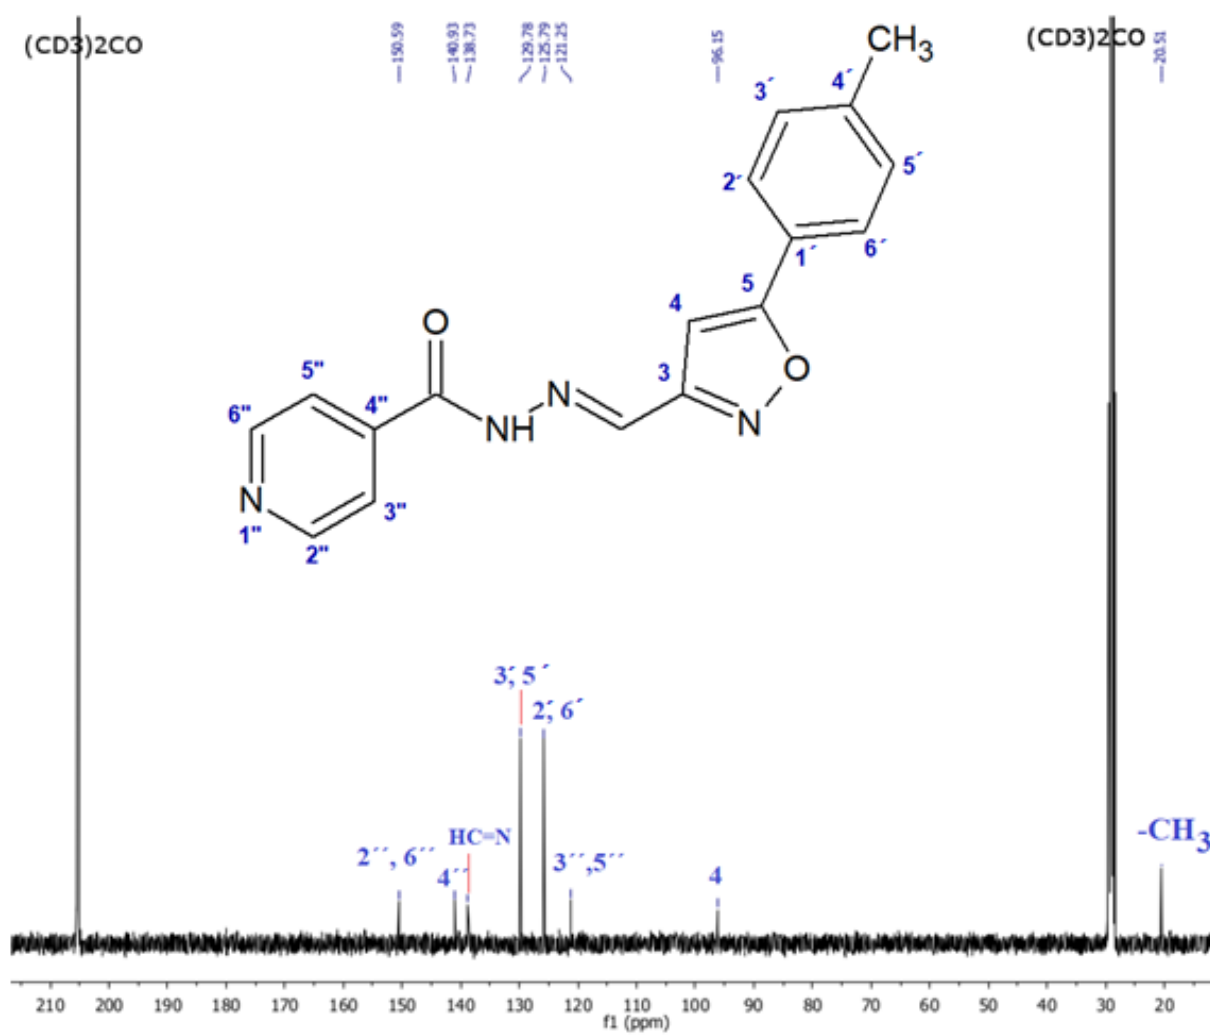

Supplementary figure 35. <sup>13</sup>C{<sup>1</sup>H} NMR spectrum of compound **7** (126 MHz, acetone-*d*<sub>6</sub>)

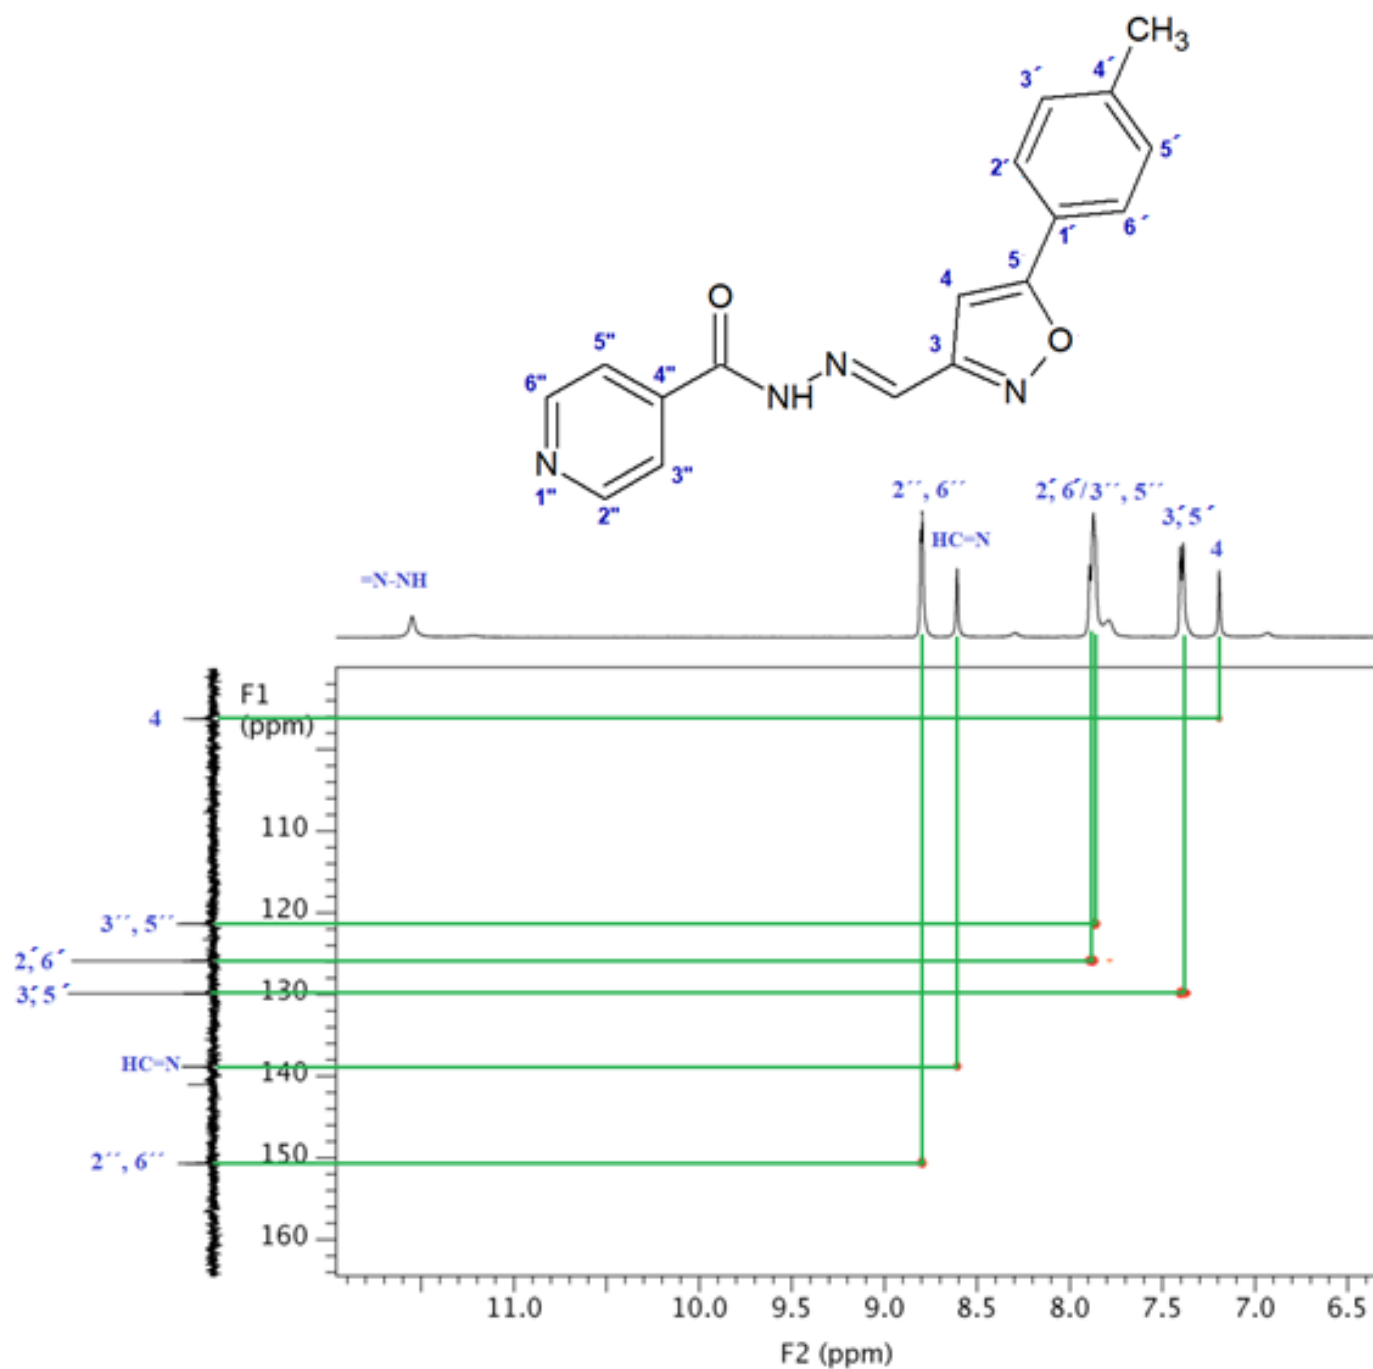

Supplementary figure 36. Two-dimensional <sup>1</sup>H-<sup>13</sup>C HSQC NMR spectrum, recorded in acetone-*d*<sub>6</sub> for **7**

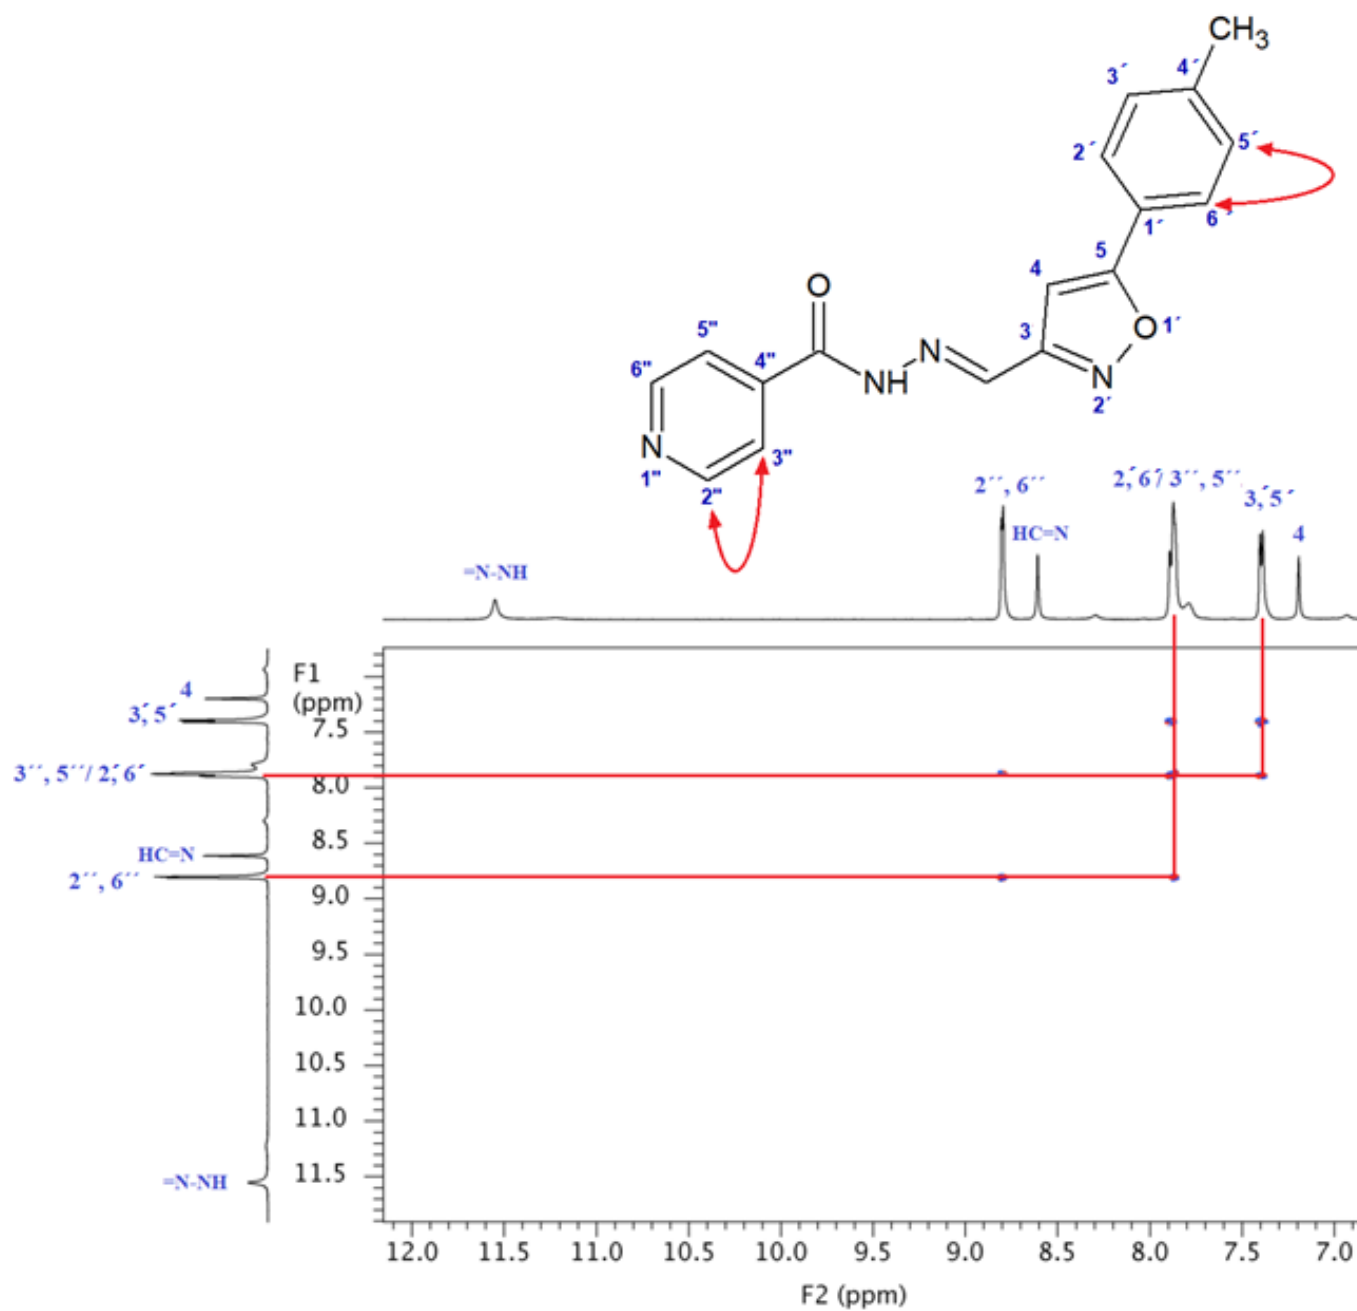

Supplementary figure 37. Two-dimensional <sup>1</sup>H-<sup>1</sup>H DQFCOSY NMR spectrum, recorded in acetone-*d*<sub>6</sub> for **7**

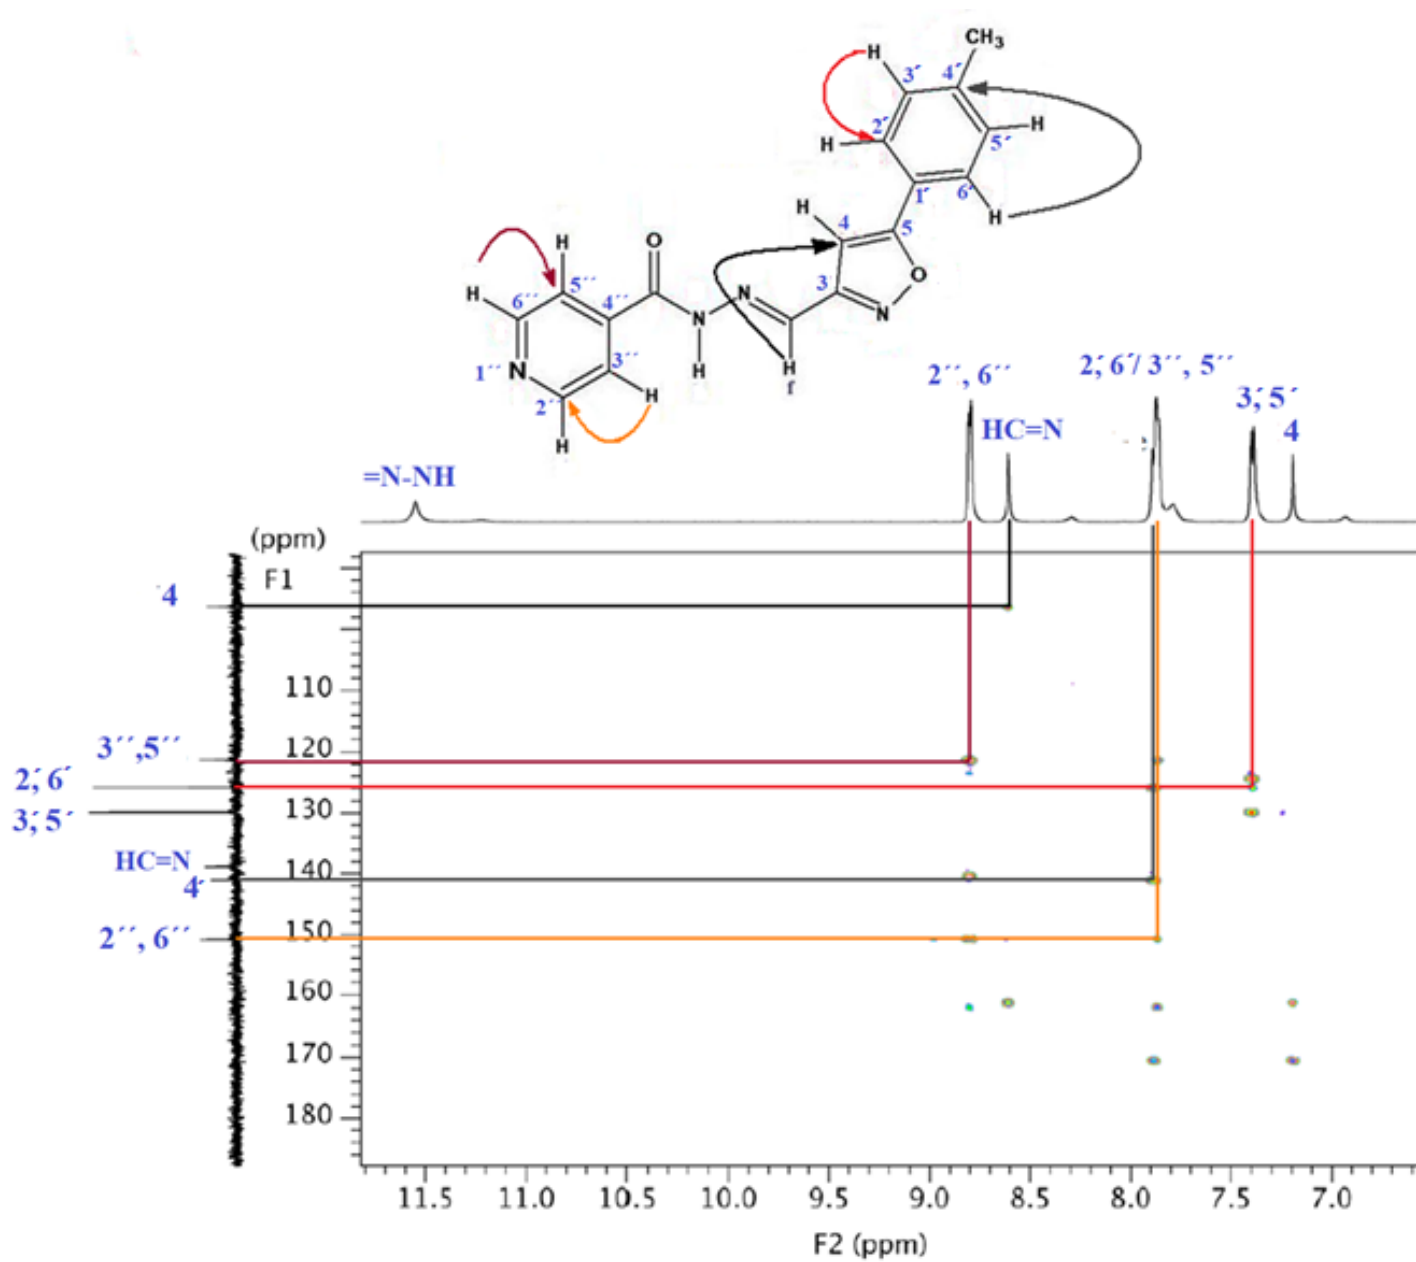

Supplementary figure 38. Two-dimensional  $^1\text{H}$ - $^{13}\text{C}$  HMBC NMR spectrum, recorded in acetone- $d_6$

for **7**

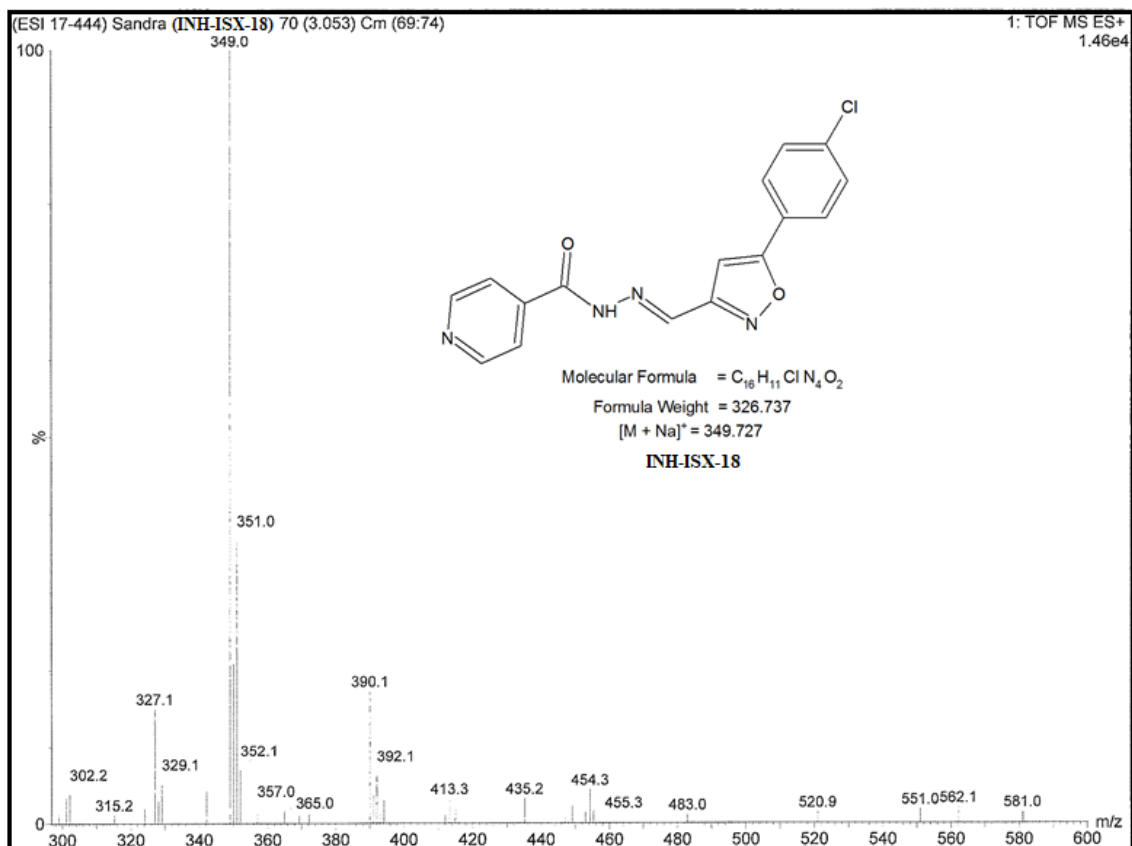

Supplementary figure 39. ESI-mass spectrum of compound **8**

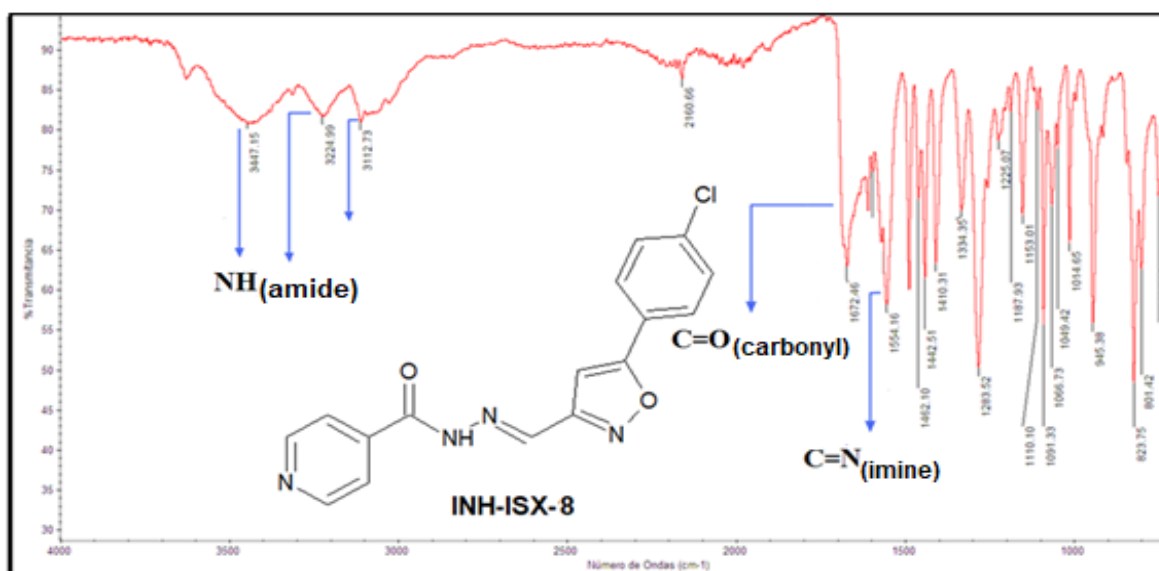

Supplementary figure 40. FT-IR spectrum of compound **8**



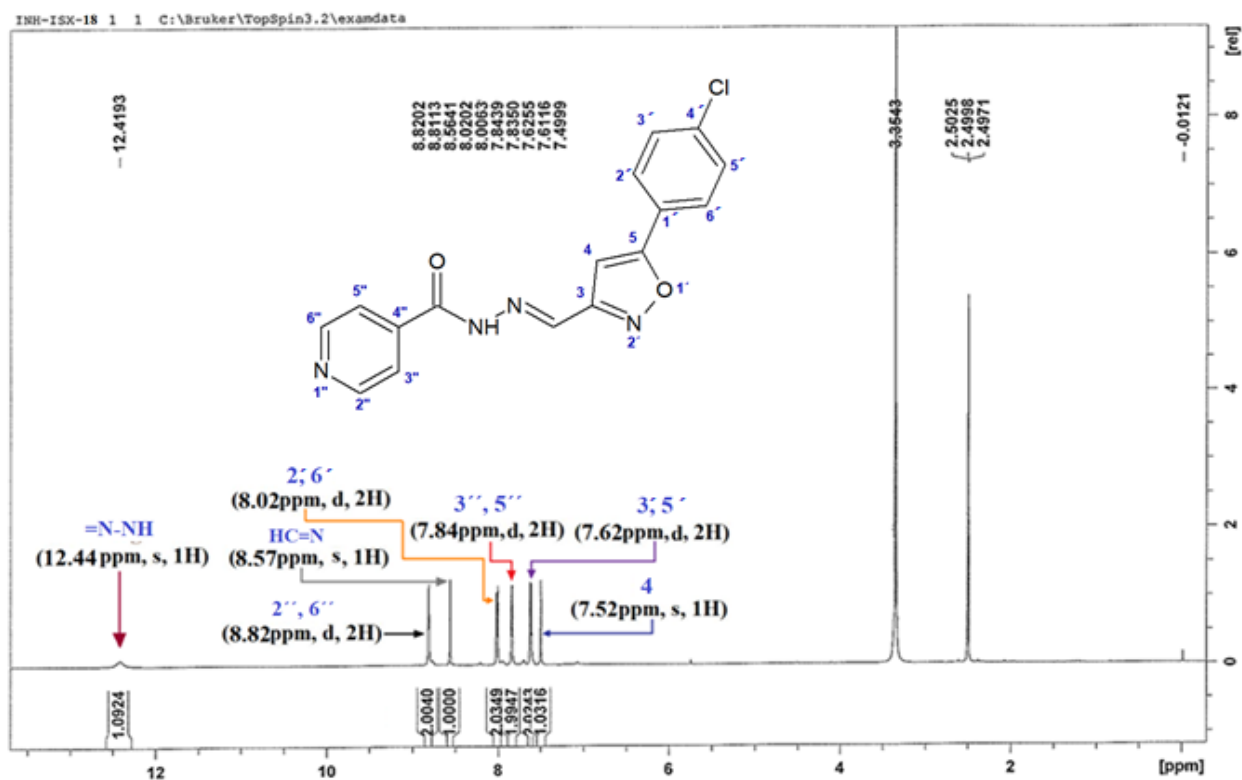

Supplementary figure 41.  $^1\text{H}$  NMR spectrum of compound **8** (600 MHz,  $\text{DMSO-}d_6$ )

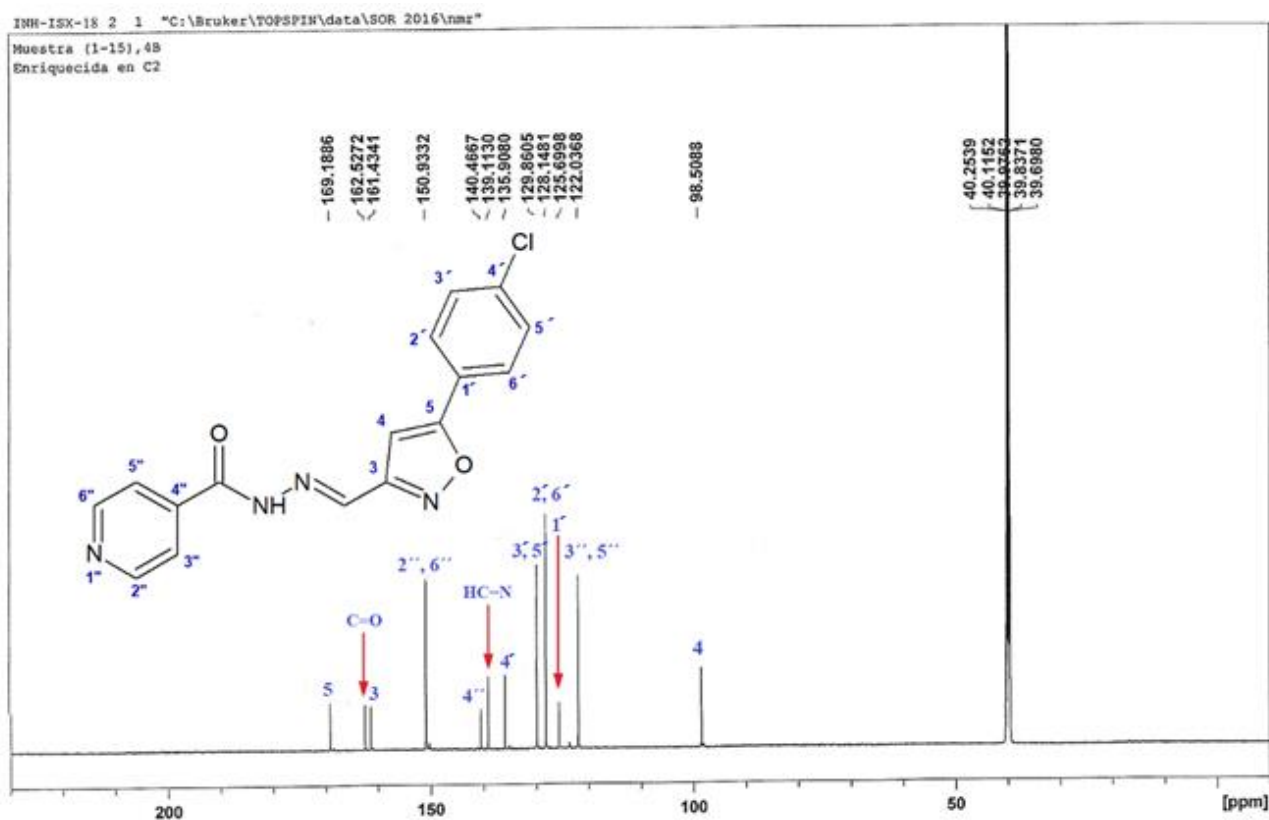

Supplementary figure 42.  $^{13}\text{C}$  NMR spectrum of compound **8** (150 MHz,  $\text{DMSO-}d_6$ )
